**Stimulus-specific adaptation to behaviorally-relevant sounds** 1

**in awake rats** 2

**A. Yaron<sup>1,2</sup>, M. M. Jankowski<sup>2</sup>, R. Badrieh<sup>1</sup>, I. Nelken<sup>1,2</sup>** 3

<sup>1</sup>Department of Neurobiology, Institute of Life Sciences, Hebrew University of 4

Jerusalem, Jerusalem, Israel <sup>2</sup> The Edmond and Lily Safra Center for Brain Sciences, 5

Hebrew University of Jerusalem, Jerusalem, Israel 6

7

Running title: SSA to behaviorally-relevant sounds in awake rats 8

9

Corresponding author: 10

Israel Nelken 11

The Edmond and Lily Safra Center for Brain Sciences, Edmond J. Safra Campus, 12

Jerusalem 91904, Israel 13

Tel. +972-2-6584229 14

Fax +972-2-6586077 15

Email: [israel.nelken@mail.huji.ac.il](mailto:israel.nelken@mail.huji.ac.il) 16

## Abstract

17

Stimulus-specific adaptation (SSA) is the reduction in responses to a common stimulus that does not generalize, or only partially generalizes, to other stimuli. SSA has been studied mainly with sounds that bear no behavioral meaning. We hypothesized that the acquisition of behavioral meaning by a sound should modify the amount of SSA evoked by that sound. To test this hypothesis, we used fear conditioning in rats, using two word-like stimuli, derived from the English words "danger" and "safety", as well as pure tones. One stimulus (CS+) was associated with a foot shock whereas the other stimulus (CS-) was presented without a concomitant foot shock. We recorded neural responses to the auditory stimuli using chronically implanted multi-electrode arrays, recording responses telemetrically in freely moving animals before and after conditioning. Consistent with our hypothesis, SSA changed in a way that depended on the behavioral role of the sound: the contrast between standard and deviant responses remained the same or decreased for CS+ stimuli but increased for CS- stimuli, showing that SSA is shaped by experience. In most cases the sensory responses underlying these changes in SSA increased following conditioning. Unexpectedly, the responses to CS+ word-like stimuli showed a specific, substantial decrease, which we interpret as evidence for substantial inhibitory plasticity.

18

19

20

21

22

23

24

25

26

27

28

29

30

31

32

33

34

## Introduction 35

Neural responses throughout the auditory system show sensitivity to stimulus 36  
probability. Such sensitivity is often probed using oddball sequences (1). In an oddball 37  
sequence, a common (standard) sound and a rare (deviant) sound are randomly 38  
intermixed. The concomitant reduction in the response to the common stimulus that 39  
does not generalize, or only partially generalizes, to other, rare stimuli, was named 40  
stimulus specific adaptation, SSA (2). SSA has been demonstrated in the auditory 41  
system of many mammalian species, including cats, rats, mice, gerbils, macaques, and 42  
bats (1,3–10) as well as in birds (11–14). In addition to auditory cortex, SSA (at least 43  
for pure tones) has been found in rat inferior colliculus (8,15,16), rat thalamic reticular 44  
nucleus (17), and the medial geniculate body (MGB) of rats (5) and mice (3), but not 45  
in the in the rat cochlear nucleus (18). Most studies of SSA used pure tones of different 46  
frequencies as standards and deviants. More recently, we demonstrated SSA for 47  
complex sounds (19). In particular, we demonstrated SSA for word-like stimuli that 48  
have been acoustically adapted to the rat auditory system. 49

Previous studies of SSA have used sounds that did not carry a behavioral meaning. The 50  
current study was designed to explore how the behavioral relevance of sounds affects 51  
the probability dependence of the responses they evoke. Functionally, it may be 52  
advantageous to reduce the adaptation of the responses evoked by a sound which 53  
predicts a negative consequence (e.g. CS+ sounds in discriminative fear conditioning 54  
paradigms), in order to ensure a robust neuronal representation of such sounds. Such a 55  
change would make the responses to standards and deviants more similar to each other, 56  
and SSA for such a sound would become smaller. The reverse may be advantageous 57  
for sounds that are associated with a neutral consequence (e.g. CS- sounds in 58

discriminative fear conditioning paradigms): by 59  
stronger adaptation and therefore larger SSA following conditioning. 60  
It is now well established that learning modifies systematically the representation of 61  
acoustic information in A1. Shifts of frequency tuning that favor behaviorally important 62  
frequencies are a consistent finding across many types of training, reinforcement 63  
motivation, and laboratories. Plasticity in A1 underlies at least some features of 64  
auditory memory (20,21). Fear conditioning is an easy and robust way of modifying 65  
animal behavior (22). When used with pure tones, the plastic changes that fear 66  
conditioning induces in the auditory system are reasonably well-understood (23–25). 67  
We therefore used fear conditioning to explore the interaction of learning with SSA. 68  
We used both pure tones and the word-like stimuli developed in Nelken et al. (19) for 69  
discriminative fear conditioning, and measured the SSA evoked by these sounds before 70  
and after conditioning. SSA indeed tended to decrease for the CS+ and increase for the 71  
CS- sounds following conditioning. Unexpectedly, the patterns of changes in the neural 72  
responses that led to these consequences was dependent on the acoustic structure of the 73  
stimuli used during conditioning. Consistent with previous findings, conditioning with 74  
pure tones increased neural responses to all stimuli. In contrast, conditioning with word- 75  
like stimuli led to a specific and surprisingly large decrease in the responses to the CS+ 76  
stimulus. 77

## Materials and Methods 78

### Animals 79

The joint ethics committee (IACUC) of the Hebrew University and Hadassah Medical 80  
Center approved the study protocol for animal welfare. The Hebrew University is an 81

AAALAC International accredited institute. We used 21 adult female Sabra rats for this study (Harlan Laboratories Ltd., Jerusalem, Israel). The rats were kept in a temperature and humidity-controlled room, maintained on a 12-h light/dark cycle (lights on from 07:00 to 19:00), and had free access to water and standard rodent food pellets (Harlan Laboratories) except during the recording sessions.

### **Experimental Design**

The timeline of the experiment is described in Fig 1. On week 1, rats were habituated to handling for 5 days, 20 min each day. On week 2 rats were habituated to the experimental cage (a 53x35 cm box with a grid floor, Med Associates, Inc.; context A), 20 min each day. On day 15, the rats went through electrode implantation surgery and left to recover for 3 days. Responses to auditory stimuli (see below for details) were collected for 2 days and then, to confirm stability of the recordings, for another 2 days a week later. Five days after the conclusion of the recording sessions, the rats underwent conditioning. One and two days following conditioning, the rats were tested for freezing in a different context (context B) and auditory responses were collected again. Context B had a black plastic floor placed over the metal grid floor, and a blue plastic sheet was placed around the walls, modifying the shape of the box. The conditioning and test boxes and the grid floor were cleaned before and after each session with 70% ethanol.

### ***Fig 1. Experimental design.***

(a) The timeline of the experiment (in days). (b) Conditioning was performed in context A (CS+ coupled with foot shocks), testing was performed in context B (CS+ without foot shocks). (c) To induce conditioning, animals were exposed to 20 blocks of sounds, alternating between CS- (green) and CS+ (red). A block consisted of a 30s train of one of the stimuli delivered at 0.5 Hz. CS+ was paired with a foot shock (2 s, 0.4 mA). The onset of the foot shock was 2 seconds before the end of the sequence. In a fear retrieval test, rats received alternately 4 presentations of CS- and 4 presentations of CS+ stimuli with no shock associated with either.

**Surgical procedure** 110

Rats were anesthetized initially in an induction chamber with sevoflurane (8% in 111  
oxygen, Piramal Critical Care Inc., Bethlehem, PA, USA). Their heads were shaved 112  
and they were placed in a stereotaxic instrument with a mask for gas anesthesia (David 113  
Kopf Instruments, CA, USA). Sevoflurane concentration was slowly adjusted to the 114  
level of 2-2.5% and maintained at this level throughout the surgery. Surgical level of 115  
anesthesia was verified by lack of pedal-withdrawal reflex. The eyes were protected 116  
with a thick layer of vaseline and the skin on the head was disinfected with povidone- 117  
iodine solution (10%, equivalent of 1% iodine, Rekah Pharm. Ind. Ltd., Holon, Israel). 118

A 1.5-2 cm longitudinal cut of the skin on the head was made and the bones of the skull 119  
were exposed. The connective tissue was mechanically removed from the skull and 120  
bones were treated with a 15% hydrogen peroxide solution (Sigma Aldrich Inc., St. 121  
Louis, MO, USA) which was immediately flushed with sterile saline. When the surface 122  
of the skull was clean and dry, a reference point for the implantation of recording 123  
electrodes was marked. Subsequently, 7-8 holes for supporting screws were drilled and 124  
screws were mounted in the skull. The screws were fixed together and to the bone with 125  
dental cement (Coral-fix, Tel Aviv, Israel) forming a base for the implant. The electrode 126  
implantation site was kept free of dental cement. 127

A small opening was drilled in the skull above auditory cortex and the dura was 128  
removed. Rats were implanted with custom designed 16 electrode arrays (MEA, 129  
Microprobes for Life Sciences, Gaithersburg, MD). The electrodes were 75-micron 130  
diameter Parylene C coated tungsten wires with a nominal impedance of 1M $\Omega$ . Beyond 131  
the epoxy, their length was 4 mm. They were organized in a 4X4 square with 0.3 mm 132  
spacing. 133

The electrodes were implanted using a stereotaxic Instrument (David Kopf Instruments, 134  
Tujunga, California), vertically, just medial to the lateral ridge, at coordinates targeted 135  
to the left primary auditory cortex (5 mm posterior to bregma, 2.3-2.4 mm below brain 136  
surface). While lowering of the electrodes inside the brain, responses to auditory 137  
stimuli were recorded and the final depth of the electrodes was set accordingly. The 138  
array was fixed to the base of dental cement previously prepared on the skull. The 139  
ground wire was soldered to one of the screws and insulated. 140

The wounds were cleaned and treated in situ with antibiotic ointment (synthomycine, 141  
chloramfenicol 5%, Rekah Pharm. Ind. Ltd., Holon, Israel) and dermatol 142  
(bismuthisubgallate, Floris, Kiryat Bialik, Israel). To prevent postoperative pain, rats 143  
received subcutaneous injection of Carprofen 50 mg/ml (5% W/V) in a dose of about 144  
13 mg/kg (Norocarp, Norbrook Laboratories Limited, Newry, Co. Down, Northern 145  
Ireland) immediately following the surgery. Injections of Carprofen were repeated once 146  
daily if any symptoms of pain were identified. Rats were allowed 3 days of recovery 147  
post-surgery. After surgery animals were housed individually to prevent injury or 148  
damage to the implants. 149

### **Sound presentations** 150

Pure tones and broadband noise (BBN) were generated digitally online. The word-like 151  
stimuli were loaded from pre-synthesized files. All sound generation was performed 152  
using Matlab (The Mathworks, Inc.). The digital signals were transduced to voltage 153  
signals by a sound card (M-16 AD, RME), attenuated (PA5, TDT), and played through 154  
a stereo power amplifier (SA1, TDT) and a free field speaker (MF1, TDT) that was 155  
placed above the experimental cage. For pure tones, 0 dB attenuation corresponded to 156  
a sound level of about 100 dB SPL throughout the frequency range of the word stimuli. 157

**Electrophysiological recordings** 158

Recordings were performed using an AlphaLab SnR™ recording system (Alpha 159  
Omega Engineering, Nazareth, Israel) connected to a TBSI transmitter-receiver system 160  
for wireless recordings (Triangle BioSystems International, Durham, NC, USA). The 161  
64-channel transmitter and the battery were mounted onto a custom-made 162  
interconnector with a battery holder (total weight of the interconnector with the 163  
transmitter and the battery was approximately 15 g). Before each recording session, the 164  
device was attached to the electrode array. 165

Each of the four recording sessions (two before and two after conditioning) started with 166  
a characterization of the response properties of the recording location. First, we 167  
recorded responses to broad-band noise (BBN) using a sequence of 280 BBN bursts 168  
with a duration of 200 ms, 10 ms linear onset and offset ramps, ISI (onset-to-onset) of 169  
500 ms, and seven different attenuation levels (0-60 dB with 10 dB steps). Levels were 170  
presented pseudo-randomly so that each level was presented 40 times. 171

Responses to tones were collected using quasi-random frequency sequences of 370 pure 172  
tone bursts (50 ms, 5 ms rise/fall time; ISI of 500 ms) at 37 frequencies (1–64 kHz, 6 173  
frequencies per octave). The sequences were presented at decreasing attenuation levels, 174  
starting at 10 dB attenuation with 10 dB steps until the threshold of the neural activity 175  
was reached (usually at 50-60 dB attenuation). On the first day of recording, these data 176  
were used to select the main frequencies and sound levels for all behavioral tests using 177  
tones. The best frequency (BF) was determined as the frequency that gave rise to the 178  
strongest responses in most electrodes. Two frequencies evoking large responses were 179  
selected on either side of the BF, symmetrically, for further study. The lower frequency 180  
was denoted  $f_1$ , the higher was denoted  $f_2$ , and they were selected such that  $f_2/f_1=1.44$ . 181



We then recorded responses to oddball sequences consisting of the word stimuli and (separately) of pure tones of the two selected frequencies.

### **Oddball sequences**

Tone oddball sequences consisted of 30 ms (5 ms rise/fall time) pure tone bursts, presented with an interstimulus interval (ISI, onset to onset) of 300 ms. Each sequence contained 25 deviants and 475 standards in a pseudo-random order, so that the deviant frequency had a probability of 5%. These are the conditions used in most SSA studies coming from our lab (7,26). Two oddball sequences have been used, one with f1 standard and f2 deviant, and the other with the roles of the two frequencies reversed.

The word stimuli ('danger', phonetically /'deɪndʒər/, and 'safety', phonetically /seɪfti/, respectively) were computer generated by an open-source text to speech synthesizer (Festival, Linux, Fedora 14) and modified using the STRAIGHT vocoder (Kawahara et al. 2008) and Matlab routines. The frequency content of the two sounds was shifted above 1 kHz and the pitch contour was set to a constant 350 Hz in order to remove pitch cues for word identity. The total energy and power spectra of the two sounds were equalized in order to remove simple energy and spectral cues for word identity. These modifications resulted in sounds that had some features of speech, notably strong spectro-temporal modulations in the speech range (Supplementary Fig. 1). Oddball Sequences consisting of word stimuli were presented at a rate of 1 Hz. The deviant word (either "danger" or "safety") had a probability of 5%, and the oddball sequences consisted of 500 stimuli (475 standards and 25 deviants). Two sequences were presented. In one sequence, the standard was "danger" and the deviant was "safety". In opposite sequence "danger" was the deviant and "safety" the standard. presentations were counterbalanced.

**Fear conditioning** 206

We used a discriminative fear conditioning protocol, loosely adapted from Letzkus et. 207  
al. (2011). The rats were exposed to 20 blocks of sounds, alternating between CS- and 208  
CS+, with silent intervals of 60 - 180 s (randomly selected) between the blocks (Fig. 209  
1C). Each block consisted of a 30 s train of one of the stimuli at a sound pressure level 210  
of 70 dB. The CS+ was paired with a foot shock (2 s, 0.4 mA). The onset of the foot 211  
shock was 2 seconds before the end of the sequence. 212

Each word was used (in different groups of rats) as CS+ and as CS-. During the 30 s 213  
sequences, the stimuli were presented at 0.5 Hz (once every 2 s). A pseudo-conditioned 214  
group was subjected to the same procedure (using the word stimuli) but without 215  
applying foot shocks. 216

To condition with tones, the CS+ and CS- sequences consisted of 30 s sequences of 217  
pure tones of the two previously selected frequencies (30 ms tone pips, presented every 218  
300 ms, 5 ms linear onset/offset ramps). 219

On the two days following conditioning, the rats were submitted to fear retrieval test in 220  
context B, during which they were exposed alternately to presentations of the CS- and 221  
of the CS+ sound sequences, for a total of 4 times each (Fig. 1D). 222

**Behavioral analysis** 223

To determine the amount of freezing, we monitored rat behavior using a ceiling 224  
mounted CCD video camera (DFK 23G445, The imaging source, Taipei city, Taiwan). 225  
Video images (30 frames/s) were later analyzed and synchronized with behaviorally- 226  
relevant events (sound and shock presentations) using custom Matlab routines 227  
(supplementary Fig. 2). Each frame was smoothed with a Gaussian filter with a width 228  
of 10 pixels and transformed into grayscale. Each frame was subtracted from the 229

previous one, the difference images were thresholded, and the number of non-zero 230  
pixels provided a measure of the amount of movement from one frame to the next. The 231  
amount of movement was smoothed over 2 s periods (boxcar smoothing, 59 points at 232  
30 Hz), and freezing was detected when the smoothed trace decreased below a 233  
threshold. This procedure had two free parameters, the threshold for the detection of 234  
pixels that changed in the temporal difference images, and the threshold for detecting 235  
freezing. These were determined to fit best a set of test cases scored manually for the 236  
amount of freezing. 237

Mean freezing was calculated for 40 s following the beginning of each stimulus block 238  
(block duration + 10 s). Baseline freezing was calculated from the first two minutes of 239  
each session, before the presentation of the first stimulus block. 240

The amount of freezing in the different conditions was analyzed using a linear mixed 241  
effects model (Matlab, function fitlme). The fixed factors were the experimental group 242  
(conditioned to words, conditioned to tones, pseudo conditioned) and stimulus 243  
condition (Baseline, CS-, CS+), with rats within groups used as a random factor. 244

### **Analysis of the electrophysiological data** 245

The data were analyzed using Matlab. Local field potentials (LFPs) were extracted from 246  
the raw electrode signals by lowpass filtering (corner frequency: 200 Hz) and 247  
downsampling from 22 to 1 kHz. 248

For the tone responses, LFP responses were baseline corrected to the 50 ms before 249  
stimulus onset. The peak negative response was identified in the 40 ms time window 250  
starting at stimulus onset, and response strength was quantified by averaging the LFP 251  
over the 9 ms window centered on the peak. 252

For the word responses, LFP responses were baseline corrected to the 50 ms before 253  
onset of the first vowel (the justification for this procedure is described in the Results 254  
section). The peak negative response was found in the 40 ms time window starting at 255  
the onset of the first vowel, and response strength was quantified by averaging the LFP 256  
over the 9 ms window centered on the peak. 257

The responses to a given stimulus were included in the final dataset when there was a 258  
significant response in at least one of the conditions (standard, deviant, before 259  
conditioning, after conditioning). Significance test was performed by a paired t-test 260  
between the set of single-trial responses (same response window as above) and the 261  
corresponding pre-stimulus LFP ( $p < 0.05$ ). 262

In order to quantify the effect of probability on tone responses, the contrast between the 263  
responses to the same stimulus when it was standard and when it was deviant was used. 264

This contrast is termed SSA index (SI, Ulanovsky et al. (1)): 265

$$SI_1 = \frac{d_1 - s_1}{d_1 + s_1}, \quad SI_2 = \frac{d_2 - s_2}{d_2 + s_2} \quad 266$$

Where  $d_i$  and  $s_i$  represent the responses to the two different stimuli ( $i=1,2$ ) when they 267  
were deviant and standard respectively. 268

The responses to the word stimuli were analyzed using a linear mixed effects model 269  
(Matlab routine fitlme). The fixed factors were the behavioral role of the sound 270  
(CS+/CS-, conditioned to tones, pseudo conditioned), sound probability 271  
(standard/deviant), and time (before/after conditioning). Stimulus type ('safety' or 272  
'danger'), rat, recording session (1<sup>st</sup> or 2<sup>nd</sup>), and electrode within rat were entered as 273  
random factors. The responses to the tones were analyzed using a similar model: 274  
behavioral role (CS+/CS-, conditioned to words, pseudo-conditioned), sound 275  
probability and time. Stimulus type (low or high frequency), rat, recording session (1<sup>st</sup> 276

or 2<sup>nd</sup>), and electrode within rat were entered as random factors. Table 1 reports the results for all fixed effects (Matlab routine anova). All main effects and almost all interactions were significant, often highly so. We therefore report later the results of post-hoc tests of individual contrasts between fixed effects (coefficient tests using the Matlab routine coefTest, performing an F test for the specific contrast against the hypothesis that it is zero).

**Table 1.**

| <b>Responses to word-like stimuli</b>                              |                |                         |
|--------------------------------------------------------------------|----------------|-------------------------|
| <i>Main effects</i>                                                |                |                         |
| Sound probability (standard/deviant)                               | F(1,3979)=5.3  | P=0.021                 |
| Time (before/after conditioning)                                   | F(1,3979)=6.2  | P=0.013                 |
| Behavioral role (CS+,CS-,Pseudo-conditioning,conditioned to tones) | F(3,3979)=6.6  | P=2.0*10 <sup>-4</sup>  |
| <i>Interactions</i>                                                |                |                         |
| Probability x Time                                                 | F(1,3979)=16   | P=6.6*10 <sup>-5</sup>  |
| Probability x Behavioral role                                      | F(3,3979)=5.9  | P=5.5*10 <sup>-4</sup>  |
| Time x Behavioral role                                             | F(3,3979)=4.7  | P=2.7*10 <sup>-3</sup>  |
| Probability x Time x Behavioral role                               | F(3,3979)=11   | P=4.3*10 <sup>-7</sup>  |
| <b>Responses to Tones</b>                                          |                |                         |
| <i>Main effects</i>                                                |                |                         |
| Sound probability (standard/deviant)                               | F(1,3860)=75   | P=5.4*10 <sup>-18</sup> |
| Time (before/after conditioning)                                   | F(1,3860)=32   | P=2.0*10 <sup>-8</sup>  |
| Behavioral role (CS+,CS-,Pseudo-conditioning,conditioned to words) | F(3,3860)=3.0  | P=0.029                 |
| <i>Interactions</i>                                                |                |                         |
| Probability x Time                                                 | F(1,3860)=0.92 | P=0.34                  |
| Probability x Behavioral role                                      | F(3,3860)=8.1  | P=2.1*10 <sup>-5</sup>  |
| Time x Behavioral role                                             | F(3,3860)=7.5  | P=5.0*10 <sup>-5</sup>  |
| Probability x Time x Behavioral role                               | F(3,3860)=13   | P=3.7*10 <sup>-8</sup>  |

## Results 284

Twenty-one rats underwent the full experimental procedure (10 conditioned to words, 285  
of which 5 rats were conditioned to ‘safety’ and 5 rats to ‘danger’; 6 conditioned to 286  
tones; 5 pseudo-conditioned, of which only 4 have valid behavioral data). The 287  
behavioral results are summarized in Fig. 2. 288

The significant main effect of stimulus condition ( $F(2,471)=8.4$ ,  $P=2.5*10^{-4}$ ) confirmed 289  
that freezing differed for presentations of different stimuli (Baseline, CS- and CS+) 290  
with less freezing at Baseline than at both CS+ and CS-. The main effect of conditioning 291  
group was not significant ( $F(2,471)=0.19$ ,  $P=0.83$ ), but there was a significant 292  
interaction between stimuli and group ( $F(4,471)=3.2$ ,  $P=0.013$ ) demonstrating that 293  
following conditioning, the different groups (conditioned to tones, to words, and 294  
pseudo-conditioned) showed different patterns of freezing. 295

### *Fig 2. Behavioral results* 297

Mean percentage of freezing for the conditioned animals at baseline, during CS+ 298  
presentations, and during CS- presentations. Left: Word group. Middle: Tone group. Right: 299  
Pseudo-conditioning group. Error bars are standard error of the mean amount of freezing 300  
within animal. 301

All rats in the word group froze more during CS+ than at baseline (Fig 2, left). There 303  
was also a generalization: during CS- presentations, all rats also showed elevated 304  
freezing relative to baseline. However, almost all rats (9/10) froze more when CS+ was 305  
presented than when CS- was presented. A post-hoc test showed a significant difference 306  
between freezing during CS+ and CS- presentations ( $F(1,471)=11$ ,  $P=8.0*10^{-4}$ ). 307

The rats conditioned with tones (Fig. 2, middle) displayed a similar pattern: they froze 308  
during both CS+ and CS-, but more to CS+. In this group the difference between 309  
freezing for CS+ and CS- was not significant ( $F(1,471)=1.8$ ,  $P=0.18$ ). This could be 310  
due to the small number of animals used for this test, or to the small frequency interval 311  
between CS+ and CS- (half octave). 312

In the pseudo conditioned group (Fig 2, right; the behavioral data of one of the animals 313  
was not recorded) there was no significant increase in freezing for either stimulus 314  
relative to baseline ( $F(2,471)=0.33$ ,  $P=0.72$ ). 315

We recorded LFPs from 336 recording locations in 21 rats. Figure 3 shows the 316  
population averages of the responses to the two word stimuli. Since the word stimuli 317  
had a complex temporal structure, the responses included multiple temporal 318  
components. Figures 3a and 3b display, from top to bottom, the waveforms of the word 319  
stimuli, the average of all responses in all animals, and the responses in each individual 320  
animal averaged over all electrodes. For both words, the first response component was 321  
evoked by the onset of the initial consonants (/d/ and /s/), at 270 ms after trial onset for 322  
“danger” and 302 ms after trial onset for "safety". The next response component, which 323  
was the largest one for both words, was evoked by the onset of the first vowels (/ei/), 324  
at 395 ms "danger" and 298 ms for "safety". The third response component was evoked 325  
by the final consonant of the 1<sup>st</sup> syllable of each word (/n/ and /f/, 592 ms "danger", 565 326  
ms "safety"). The fourth component was evoked by the onset of the second vowel (/er/ 327  
and /i/, 690 ms "danger", 630 ms "safety"). 328

329

***Fig 3. Responses to word stimuli*** 330

The waveform of the word stimuli (top), mean LFP responses over all electrodes and all animals (middle), and the average responses for all electrodes within animal, plotted for all animals (bottom). (a) For the word 'danger'. (b) For the word 'safety'. 331  
332  
333

334  
As seen at the bottom of Fig. 3, response components showed high variability between 335  
animals. We therefore report all our results for the onset response to the first vowel of 336  
each word, a component that occurred in all animals. The responses at other time 337  
windows generally changed in parallel with these responses (27). 338

Responses to the word-like stimuli and to tones were collected in all three groups (word 339  
group, tone group, and the pseudo-conditioned group). All main effects and interactions 340  
were significant (Table 1), showing that SSA was present (main effect of probability 341  
both for words and for tones) and that conditioning indeed modified the responses in 342  
ways that depended on the probability as well as on the behavioral role of the stimulus. 343  
We therefore report below the results of post-hoc tests for the specific contrasts of 344  
interest. 345

We first discuss the effects of conditioning on SSA. Figure 4 summarizes these data. 346  
Each panel shows the distribution of the SSA indices computed before and after 347  
conditioning, for the word-like stimuli (top row) and the tone stimuli (bottom row). 348  
Control A consists of the SSA recorded in rats conditioned to the other stimulus (to 349  
tones for the word-like stimuli, to word-like stimuli for the tone stimuli). Control B 350  
consists of the recordings in the pseudo-conditioned rats. 351

352



**Figure 4. Changes in SSA following conditioning**

353

(a) Box plots showing the distribution of SSA indices before (left, gray) and after (right, black) conditioning, for word stimuli used as CS+. The dashed line is at 0, corresponding to equal responses to standards and to deviants. The box is centered on the median of the distribution and its top and bottom edges indicate the 25<sup>th</sup> and 75<sup>th</sup> percentiles of the distribution. Outliers are marked by red plus signs, and the whiskers show the extent of all the data that is not considered as outliers. The notches represent 5% confidence intervals around the medians. (b) The same for word CS- stimuli. (c) The same for the responses to word stimuli recorded in animals conditioned with tones. (d) The same for responses to word stimuli recorded in pseudo-conditioned animals. (e)-(h) The same, for tone stimuli. In this case, control A consisted of recordings of tone responses in animals conditioned with word-like stimuli.

354  
355  
356  
357  
358  
359  
360  
361  
362  
363  
364

365

We hypothesized in the introduction that SSA would decrease for the CS+ stimuli and increase for the CS- stimuli. When the word-like stimuli served as CS+, there was a significant decrease of the SSA index following conditioning (Fig 4a, -13%,  $F(1,1808)=16, P=8.3*10^{-5}$ ). In contrast, when they served as CS-, there was a moderate but significant increase of the SSA index following conditioning (Fig 4b, 7%,  $F(1,1808)=5.1, P=0.025$ ). In both control groups, the SSA index did not change significantly following conditioning (Fig 4c, control A, tone-conditioned animals: 12%,  $F(1,1808)=0.87, P=0.35$ ; Fig. 4d, control B, pseudo-conditioned: 0.7%,  $F(1,1808)=0.054, P=0.82$ ). Thus, the change in SSA was specific to the stimuli that gained behavioral meaning; the SSA decreased for the CS+ and increased for the CS- stimuli. These results are fully consistent with our hypothesis.

366  
367  
368  
369  
370  
371  
372  
373  
374  
375  
376

When tones served as CS+, the SSA index to remain largely the same after conditioning (Fig. 4e, -5%,  $F(1,1801)=1.5, P=0.2$ ). For CS- tones, a highly significant increase in SSA occurred after conditioning (Fig 4f, 16%,  $F(1,1801)=18, P=2.3*10^{-5}$ ). In both control groups, there was virtually no change in SSA index after conditioning (Fig 4g, control A, word-conditioned group: -0.4%,  $F(1,1808)=0.023, P=0.88$ ; Fig. 4h, control

377  
378  
379  
380  
381

B, pseudo-conditioned group: 1%,  $F(1,1801) = 0.14$ ,  $P = 0.7$ ). This pattern was partially 382  
consistent with our working hypothesis. The change in SSA was specific to stimuli that 383  
gained behavioral meaning; the SSA to CS- stimuli increased, as hypothesized, while 384  
the SSA to the CS+ stimuli didn't change significantly, 385

Next, we examined the patterns of changes in the responses to standards and deviants 386  
that underlay the changed SSA. SSA can change because the responses to standards 387  
changed and/or because the responses to deviants changed, and we wanted to find out 388  
which pattern actually occurred. 389

Figure 5a illustrates the most surprising finding. It displays the average responses to the 390  
word-like stimuli used as CS+ when they were tested as deviants, before (light red) and 391  
after (dark red) conditioning. The responses showed a substantial and highly significant 392  
decrease, rather than the expected increase (Fig 5c, deviants: -43%,  $F(1,3979) = 66$ , 393  
 $P = 5.6 \times 10^{-16}$ ). The responses to standards also decreased significantly, although to a 394  
lesser degree, following conditioning (Fig 5b and 5c, standards: -15%,  $F(1,3979) = 6.2$ , 395  
 $P = 0.013$ ). The significant decrease in SSA shown by the word-like stimuli used as CS+ 396  
(Fig. 4a) can be traced therefore to the fact that following conditioning, the responses 397  
to the CS+ word-like stimuli, when used as deviants, decreased more than the responses 398  
to the same stimuli when used as standards. 399

This decrease in the responses following conditioning was restricted to the word-like 400  
stimuli when used as CS+ during conditioning. Indeed, when used as CS-, following 401  
conditioning the responses to word-like stimuli increased when deviant (Fig 5d and 5f, 402  
deviants: 19%,  $F(1,3979) = 7.2$ ,  $P = 0.0074$ ) and did not change significantly when used 403  
as standards (Fig 7e and 7f, standards: -, -6%,  $F(1,3979) = 0.77$ ,  $P = 0.38$ ). When tested in 404  
animals that have been conditioned to tones (control A, Figs. 5g-i), the responses to the 405  
word-like stimuli increased (deviants: 29%,  $F(1,3979) = 49$ ,  $P = 3.0 \times 10^{-12}$ , standards: 406

8.2%, coefficient test:  $F(1,3979)=5.1$ ,  $P=0.024$ ; Fig 6i-k). The responses to the word- 407  
like stimuli did not change significantly in the pseudo-conditioned animals (deviants: 408  
12%, coefficient test:  $F(1,3979)=2.4$ ,  $P=0.12$ ; standards: 11%, coefficient test: 409  
 $F(1,3979)=2.3$ ,  $P=0.13$ ; Fig 5j-l). 410

**Figure 5. Changes in the responses to word-like stimuli following conditioning** 412

(a) Responses to CS+ word-like stimuli when deviants. The light red shows the responses 413  
when these stimuli were tested as deviants before conditioning. During conditioning, the 414  
same word-like stimuli were used as CS+. The dark red line shows the responses to the same 415  
stimuli when tested again as deviants after conditioning. The time window shown starts at 416  
stimulus onset and ends 40 ms after the onset of the first vowel. (b) The same, for the 417  
responses to the CS+ word stimuli when tested as standards. (c) Average peak responses to 418  
the same stimuli. The bars represent the average peak response before (gray) and after 419  
(black) conditioning. The dots represent the average peak response across all electrodes and 420  
sessions in each animal. The peak responses before and after conditioning in each individual 421  
animal are connected with a line. (d-f) The same, for word-like CS- stimuli. (g-i) The same, for 422  
the responses to word-like stimuli tested in rats conditioned with pure tones. (j-l) The same, 423  
for the responses to word-like stimuli tested in pseudo-conditioned rats. Note that in this 424  
case, while the average response (panel j) was slightly smaller after than before 425  
conditioning, the average peak response (panel l) was slightly larger. The reason for such 426  
discrepancies here and elsewhere is the fact that peak responses were determined in each 427  
electrode and animal individually, and therefore could occur at time points that are different 428  
than the time point of the peak response following averaging. 429

Responses to tones (Figure 6) showed, if anything, only increases following 431  
conditioning, as expected (28). Responses to CS+ tones increased following 432  
conditioning both when deviant (Fig 6a and 6c, deviants: 20%,  $F(1,3860)=18$ , 433  
 $P=2.1*10^{-5}$ ) and when standards (Fig 6b and 6c, standards: 45%,  $F(1,3860)=32$ , 434  
 $P=2.0*10^{-8}$ ). The Responses to CS- tones also increased, both when deviants (Fig 6d 435  
and 6f, deviants: 94%, coefficient test:  $F(1,3860)=149$ ,  $P=1.0*10^{-33}$ ) and when 436  
standards (Figs 6e and 6f, standards: 25%, coefficient test:  $F(1,3860)=6.7$ ,  $P=9.8*10^{-3}$ ). 437

438

**Figure 6. Changes in the responses to tones following conditioning** 439

Same conventions and structure as Fig. 5. Control A (g-i) in this case consists of the 440  
responses to tone stimuli in animals that have been conditioned to word-like stimuli. 441

442  
The responses to deviant tones presented to rats conditioned to word-like stimuli 443  
increased significantly after conditioning (Fig 6g and 6i, deviants: 16%,  $F(1,3860)=9.9$ , 444  
 $P=1.7*10^{-3}$ ), while the responses to the same stimuli when standards in animals 445  
conditioned to the word-like stimuli did not change significantly (Fig 6h and 6i, 446  
standards: 7.9%,  $F(1,3860)=0.87$ ,  $P=0.35$ ). Thus, the decrease in the responses to word- 447  
like stimuli used as CS+ did not generalize to other stimuli in these rats. Responses to 448  
tones didn't change significantly in pseudo-conditioned animals (deviants: 7.5%, 449  
coefficient test:  $F(1,3860)=0.90$ ,  $P=0.34$ ; standards: 8.8%, coefficient test: 450  
 $F(1,3979)=0.27$ ,  $P=0.60$ ; Figs. 6j-l). 451

**Discussion** 452

We used fear conditioning to assign a behavioral meaning to complex sounds and to 453  
pure tones and then measured SSA elicited by these sounds before and after 454  
conditioning. 455

**Methodological issues** 456

The current study was designed with the goal of recording neural signals in the same 457  
awake animals before and after conditioning, in order to allow within-animal 458  
comparison of the resulting electrophysiological changes. This experimental design 459  
made the study statistically powerful, but resulted in a long-duration protocol that made 460

it difficult to collect stable spiking activity. Thus, the paper is based on recordings of 461  
LFPs. 462

LFPs are useful indices of neuronal activity, but need to be interpreted carefully. LFP 463  
measures the total synaptic input (rather than spiking output) near the electrode tip (29). 464  
LFPs integrate currents over relatively long distances – at least 1 mm (30) - and are 465  
therefore less local than recordings of spiking activity (31). Nevertheless, LFPs are often 466  
interpreted as an index of spiking activity. Indeed, there are many experimental 467  
observations showing correlated changes in the two signals (32–34), including in 468  
auditory cortex. These correlations presumably have to do with the fact that most of the 469  
input currents in cortex are produced by local sources and therefore correlate with the 470  
overall spiking activity. Given the many demonstrations of such a correlation in 471  
auditory cortex, we accept it for the rest of the discussion. 472

### **Conditioning differentially affected SSA to behaviorally meaningful sounds** 473

Here we used the powerful classical fear conditioning paradigm in order to assign two 474  
possible meanings to sounds: a sound could either predict an aversive consequence 475  
(CS+) or predict the lack of an aversive consequence (CS-). CS- sounds are 476  
behaviorally meaningful – they occurred in 50% of the trials, and informed the rat that 477  
a shock was not imminent. Thus, we expected changes in SSA to occur for both types 478  
of sounds. In addition, we tested SSA using sounds that have not been used in the 479  
conditioning session (tones for the rats conditioned with words, and words for the rats 480  
conditioned with tones). 481

Our working hypothesis suggested that SSA to CS+ sounds should decrease and SSA 482  
to CS- sounds should increase, while SSA to sounds that have not been used during the 483  
conditioning session should be mostly unaffected. Our results are largely consistent 484

with this hypothesis: at least at the population level, SSA was affected by conditioning 485  
as expected from functional considerations – following conditioning, responses to CS+ 486  
stimuli adapted to a similar degree or less, while responses to CS- stimuli adapted more 487  
than before conditioning. 488

### **Conditioning differentially affected responses to tones and to complex sounds** 489

Although the changes in SSA roughly followed our working hypothesis for both tones 490  
and word-like stimuli, the changes in response strengths that underlay the changes in 491  
SSA showed an unexpected pattern. While response strength generally increased when 492  
the conditioned stimuli were tones, response strength to word-like CS+ stimuli 493  
decreased substantially and consistently following conditioning. 494

Fear conditioning has been almost invariably associated with increased responses to the 495  
CS+ stimulus in auditory cortex (24,23). In the experiments described here, the 496  
ubiquitous findings of increased responses to CS+ stimuli were reproduced for the tone 497  
stimuli. In fact, in animals conditioned to tones, responses to both CS+ and CS- tones, 498  
as well as to the word-like stimuli, all increased following conditioning. 499

For the word-like stimuli, on the other hand, conditioning affected differentially the 500  
size of the responses to CS+ and CS- stimuli. Responses to word-like stimuli when CS+ 501  
showed an unexpected decrease. This decrease was specific to the behavioral role of 502  
the stimulus: responses to the CS- word tended to increase when deviant and showed a 503  
non-significant decrease when standard. The decrease was also specific to the acoustic 504  
nature of the stimuli: in the same animals, responses to tones increased moderately 505  
following conditioning. 506

The specific decrease in the responses to word-like CS+ stimuli is one of the largest 507  
effects in this study. It occurred when the CS+ word was tested as deviant as well as 508

when standard. Since deviant responses decreased substantially more than standard 509  
responses, SSA decreased significantly following conditioning. In fact, the SSA index 510  
became negative on average: responses to repeated CS+ stimuli were on average 511  
somewhat larger than to rare ones. 512

To the best of our knowledge, previous research has shown two exceptions to the 513  
ubiquitous increase in the responses to the CS+ stimuli. The first is plasticity in the 514  
highly specialized auditory system of the Jamaican mustached bat, *pteronotus parnellii*, 515  
evoked by microstimulation of auditory cortex. Following this manipulation, the 516  
neurons in the stimulated region showed shifts of their frequency tuning away from the 517  
characteristic parameters of the stimulated point (23). Such shifts have been observed 518  
throughout the auditory system (in cortex, auditory thalamus and inferior colliculus) 519  
when microstimulation was performed in auditory cortex areas that were specialized 520  
for the processing of the echolocation calls (the DSCF area, the highly expanded area 521  
representing the 60 kHz component of the echolocation call, and the FM-FM area). 522  
Similar microstimulation experiments in non-specialized parts of auditory cortex gave 523  
rise to the expected tuning shifts towards the characteristic parameters of the stimulated 524  
area (35). Suga and his colleagues concluded the shifts of sensitivity away from those 525  
of the stimulated area is a property of the specialized processing areas in the bat auditory 526  
cortex (23). 527

The current results with the word-like stimuli are reminiscent of this thread of results. 528  
Instead of shifting the responses towards the CS+, there is a shift of the responses away 529  
– reduction of the CS+ responses together with a potentially moderate increase in the 530  
responses to CS- stimuli as well as to tones. In contrast with the results of Suga and 531  
colleagues, we observed these shifts in an animal that is not an auditory specialist. 532  
Nevertheless, there is an interesting analogy – the 'centrifugal' (36) shifts in our 533

experiments were observed only for complex stimuli that presumably engaged large territories of auditory cortex. We therefore suggest a possible reinterpretation of the observations of Suga and his colleagues – it is not the difference between specialized and non-specialized processing, but rather the difference between the extent of cortex that is activated by the conditioned stimuli, that is responsible for the different patterns of results.

The second report of decreased responses to CS+ stimuli concerns operant conditioning experiments in ferrets (37). In animals trained to stop licking at target presentation, the responses to the target increased during task performance. In contrast, in animals trained to lick during target presentation, the responses to the target decreased during task performance. David and Colleagues (37) interpreted these results in terms of increased contrast between the target and non-target stimuli, in either case the larger responses being elicited by the stimuli that were associated with the aversive outcomes.

In the results reported here, increased and decreased responses to CS+ stimuli could be elicited independent of the behavioral paradigm, which was identical for all animals. Thus, both increased and decreased responses were associated with an aversive target (the CS+ stimulus), depending on whether it was narrowband (a pure tone) or wideband (a word-like stimulus). While there are substantial differences between our experiments and those of David et al. (37), at the least our results disprove a simple association of the polarity of response change with reward and punishment.

### **Potential mechanisms**

We interpret the changes in LFP as reflecting a corresponding change in the size of the spiking responses of the neuronal population around the recording electrodes. Given



this assumption, our results provide two major constraints on mechanisms underlying 557  
these changes. 558

First, the changes documented here were a consequence of the conditioning procedure. 559  
This follows from the finding that neither SSA nor response strength changed 560  
significantly in the pseudo-conditioned rats. Thus, the plastic changes were initiated by 561  
the conjunction of cues that occur during the conditioning session, including the sounds 562  
and the aversive foot shocks. However, changes occurred also to the SSA evoked by 563  
CS- sounds, and in opposite direction to that evoked by CS+ sounds. Thus, plasticity 564  
occurred also in responses to sounds that were not directly associated with the aversive 565  
event, and even to sounds that were not presented at all during the conditioning sessions 566  
(tones in rats conditioned to word-like stimuli and word-like stimuli in rats conditioned 567  
to tones). 568

Second, the direction of the changes in response strength varied between tones and 569  
word-like stimuli. Responses to sounds in rats conditioned to tones increased to all 570  
stimuli (tones used as CS+, tones used as CS-, and word-like stimuli that were not used 571  
during conditioning). In contrast, the responses in rats conditioned to words specifically 572  
decreased to words used as CS+, while increasing somewhat to words used as CS- as 573  
well as to tones. 574

One mechanism that has been suggested to increase the responses to important sounds 575  
is increase in the release probability of glutamate, either at the thalamo-cortical or at 576  
the cortico-cortical synapses. In this case, deviant responses are expected to increase, 577  
but the increased synaptic depression consequent on the increased transmitter release is 578  
expected to decrease standard responses, leading to larger SSA. Such an effect has been 579  
demonstrated in consequence to environmental enrichment (38) – responses to sounds 580  
increased, but so did paired-pulse depression. The effects of conditioning on the 581

responses to CS- stimuli were consistent with this mechanism. In rats conditioned to 582  
tones, the responses to both deviants and standards CS- tones increased, with larger 583  
increases of the deviant responses. In rats conditioned to word-like stimuli, the 584  
responses to deviant CS- stimuli increased while the responses to the same stimuli when 585  
standards did not change significantly. 586

On the other hand, responses to CS+ tones increased, but the SSA index did not change; 587  
and responses to word-like CS+ stimuli decreased in size and showed smaller (actually 588  
negative) SSA. All of these observations are inconsistent with simple increase in 589  
transmitter release probability. 590

The unexpected reduction of responses to word-like CS+ stimuli following 591  
conditioning could result from decreased excitation or from increased inhibition (or 592  
both). It is unlikely that excitation was greatly reduced, since responses to other stimuli 593  
(word-like CS- when deviant as well as to tones) were actually enhanced (admittedly, 594  
not by much). Thus, the main cause of the reduction in responses is most probably an 595  
increased inhibition evoked by the CS+ word-like stimuli. 596

Inhibitory effects may increase when excitatory-to-inhibitory synapses are potentiated, 597  
or when the inhibitory synapses themselves become more potent. Increased inhibition 598  
may then reduce the sensory responses to the CS+ stimuli. The reason inhibition would 599  
be potentiated more than excitation with word-like CS+ is unclear, but could be related 600  
to the large range of frequencies that were presumably affected during conditioning. 601  
For example, PV+ interneurons have wider tuning curves than nearby excitatory 602  
neurons (40). The use of broadband CS+ stimuli could potentiate more of the excitatory 603  
inputs to PV+ interneurons than the use of a pure tone CS+, leading to an overall greater 604  
inhibition (as in (36)). 605

**Conclusions** 606

The results shown here demonstrate that SSA is shaped by experience. Whether a sound 607  
was used as CS+ or a CS- affected the subsequent degree of SSA it evokes. This finding 608  
resolves the main question that led to this study. At the same time, the use of complex 609  
sounds (word-like stimuli) led to the unexpected observation that responses to CS+ 610  
stimuli may actually decrease – even in the auditory cortex of a non-specialized 611  
mammal such as the rat, and even in the context of aversive conditioning. This finding 612  
suggests that the current understanding of plastic changes induced by a behavioral 613  
manipulation as simple as classical fear conditioning is still incomplete. 614

615

**Acknowledgements** 616

This research was supported by an advanced ERC grant (project RATLAND, no. 617  
340063), by F.I.R.S.T grant no. 1075/2013, and by ISF personal grant no. 390/2013 to 618  
IN, as well as by a grant from the Gatsby Charitable Foundation. 619

620

|                                                                                                                                                                                                                                                                                           |                          |
|-------------------------------------------------------------------------------------------------------------------------------------------------------------------------------------------------------------------------------------------------------------------------------------------|--------------------------|
| <b>References</b>                                                                                                                                                                                                                                                                         | 621                      |
| 1. Ulanovsky N, Las L, Nelken I. Processing of low-probability sounds by cortical neurons. <i>Nat Neurosci.</i> 2003 Apr;6(4):391–8.                                                                                                                                                      | 622<br>623               |
| 2. Movshon JA, Lennie P. Pattern-selective adaptation in visual cortical neurones. <i>Nature.</i> 1979 Apr 26;278(5707):850–2.                                                                                                                                                            | 624<br>625               |
| 3. Anderson LA, Christianson GB, Linden JF. Stimulus-Specific Adaptation Occurs in the Auditory Thalamus. <i>J Neurosci.</i> 2009 Jun 3;29(22):7359.                                                                                                                                      | 626<br>627               |
| 4. Malmierca MS, Cristaudo S, Pérez-González D, Covey E. Stimulus-Specific Adaptation in the Inferior Colliculus of the Anesthetized Rat. <i>J Neurosci.</i> 2009 Apr 29;29(17):5483.                                                                                                     | 628<br>629<br>630        |
| 5. Antunes FM, Nelken I, Covey E, Malmierca MS. Stimulus-Specific Adaptation in the Auditory Thalamus of the Anesthetized Rat. <i>PLOS ONE.</i> 2010 Nov 19;5(11):e14071.                                                                                                                 | 631<br>632<br>633        |
| 6. Bäuerle P, von der Behrens W, Kössl M, Gaese B. Stimulus-Specific Adaptation in the Gerbil Primary Auditory Thalamus Is the Result of a Fast Frequency-Specific Habituation and Is Regulated by the Corticofugal System. <i>J Neurosci Off J Soc Neurosci.</i> 2011 Jun 29;31:9708–22. | 634<br>635<br>636<br>637 |
| 7. Taaseh N, Yaron A, Nelken I. Stimulus-Specific Adaptation and Deviance Detection in the Rat Auditory Cortex. <i>PLOS ONE.</i> 2011 Aug 10;6(8):e23369.                                                                                                                                 | 638<br>639               |

8. Zhao L, Liu Y, Shen L, Feng L, Hong B. Stimulus-specific adaptation and its dynamics in the inferior colliculus of rat. *Neuroscience*. 2011 May 5;181(Supplement C):163–74. 640  
641  
642
9. Fishman YI, Steinschneider M. Searching for the Mismatch Negativity in Primary Auditory Cortex of the Awake Monkey: Deviance Detection or Stimulus Specific Adaptation? *J Neurosci*. 2012 Nov 7;32(45):15747–58. 643  
644  
645
10. Thomas JM, Morse C, Kishline L, O'Brien-Lambert A, Simonton A, Miller KE, et al. Stimulus-specific adaptation in specialized neurons in the inferior colliculus of the big brown bat, *Eptesicus fuscus*. *Hear Res*. 2012 Sep 1;291(1):34–40. 646  
647  
648  
649
11. Reches A, Gutfreund Y. Stimulus-specific adaptations in the gaze control system of the barn owl. *J Neurosci Off J Soc Neurosci*. 2008 Feb 6;28(6):1523–33. 650  
651
12. Reches A, Netser S, Gutfreund Y. Interactions between Stimulus-Specific Adaptation and Visual Auditory Integration in the Forebrain of the Barn Owl. *J Neurosci*. 2010 May 19;30(20):6991–8. 652  
653  
654
13. Netser S, Zahar Y, Gutfreund Y. Stimulus-Specific Adaptation: Can It Be a Neural Correlate of Behavioral Habituation? *J Neurosci*. 2011 Dec 7;31(49):17811–20. 655  
656  
657
14. Gutfreund Y. Stimulus-specific adaptation, habituation and change detection in the gaze control system. *Biol Cybern*. 2012 Dec 1;106(11–12):657–68. 658  
659

15. Patel CR, Redhead C, Cervi AL, Zhang H. Neural sensitivity to novel sounds in the rat's dorsal cortex of the inferior colliculus as revealed by evoked local field potentials. *Hear Res.* 2012 Apr 1;286(1):41–54.
16. Shen L, Zhao L, Hong B. Frequency-specific adaptation and its underlying circuit model in the auditory midbrain. *Front Neural Circuits* [Internet]. 2015 [cited 2018 Jan 4];9. Available from: <https://www.frontiersin.org/articles/10.3389/fncir.2015.00055/full>
17. Yu X-J, Xu X-X, He S, He J. Change detection by thalamic reticular neurons. *Nat Neurosci.* 2009 Sep;12(9):1165–70.
18. Ayala YA, Pérez-González D, Duque D, Nelken I, Malmierca MS. Frequency discrimination and stimulus deviance in the inferior colliculus and cochlear nucleus. *Front Neural Circuits* [Internet]. 2013 Jan 14 [cited 2017 Oct 17];6. Available from: <https://www.ncbi.nlm.nih.gov/pmc/articles/PMC3544151/>
19. Nelken I, Yaron A, Polterovich A, Hershenhoren I. Stimulus-Specific Adaptation Beyond Pure Tones. In: *Basic Aspects of Hearing* [Internet]. Springer, New York, NY; 2013 [cited 2017 Oct 17]. p. 411–8. (Advances in Experimental Medicine and Biology). Available from: [https://link.springer.com/chapter/10.1007/978-1-4614-1590-9\\_45](https://link.springer.com/chapter/10.1007/978-1-4614-1590-9_45)
20. Weinberger NM. AUDITORY ASSOCIATIVE MEMORY AND REPRESENTATIONAL PLASTICITY IN THE PRIMARY AUDITORY CORTEX. *Hear Res.* 2007 Jul;229(1–2):54–68.

21. Froemke RC, Carcea I, Barker AJ, Yuan K, Seybold BA, Martins ARO, et al. 681  
Long-term modification of cortical synapses improves sensory perception. *Nat* 682  
*Neurosci.* 2013 Jan;16(1):79. 683
22. Maren S. Neurobiology of Pavlovian fear conditioning. *Annu Rev Neurosci.* 684  
2001;24:897–931. 685
23. Suga N, Ma X. Multiparametric corticofugal modulation and plasticity in the 686  
auditory system. *Nat Rev Neurosci.* 2003 Oct;4(10):783–94. 687
24. Weinberger NM. SPECIFIC LONG-TERM MEMORY TRACES IN PRIMARY 688  
AUDITORY CORTEX. *Nat Rev Neurosci.* 2004 Apr;5(4):279–90. 689
25. Froemke RC, Merzenich MM, Schreiner CE. A synaptic memory trace for 690  
cortical receptive field plasticity. *Nature.* 2007 Nov;450(7168):425. 691
26. Hershenhoren I, Taaseh N, Antunes FM, Nelken I. Intracellular correlates of 692  
stimulus-specific adaptation. *J Neurosci Off J Soc Neurosci.* 2014 Feb 693  
26;34(9):3303–19. 694
27. Yaron A. Cortical Representation of Auditory History [Internet] [PhD thesis]. 695  
[Jerusalem, Israel]: hebrew university; 2015. Available from: 696  
<http://arad.msc.huji.ac.il/dissertations/W/JSL/001998156.pdf> 697
28. Bakin JS, Weinberger NM. Classical conditioning induces CS-specific receptive 698  
field plasticity in the auditory cortex of the guinea pig. *Brain Res.* 1990 Dec 699  
17;536(1):271–86. 700

29. Buzsáki G, Anastassiou CA, Koch C. The origin of extracellular fields and currents--EEG, ECoG, LFP and spikes. *Nat Rev Neurosci*. 2012 May 18;13(6):407–20. 701  
702  
703
30. Kajikawa Y, Schroeder CE. How local is the local field potential? *Neuron*. 2011 Dec 8;72(5):847–58. 704  
705
31. Marblestone AH, Zamft BM, Maguire YG, Shapiro MG, Cybulski TR, Glaser JI, et al. Physical principles for scalable neural recording. *Front Comput Neurosci* [Internet]. 2013 Oct 21 [cited 2017 Oct 18];7. Available from: <https://www.ncbi.nlm.nih.gov/pmc/articles/PMC3807567/> 706  
707  
708  
709
32. Medvedev AV, Kanwal JS. Local Field Potentials and Spiking Activity in the Primary Auditory Cortex in Response to Social Calls. *J Neurophysiol*. 2004 Jul 1;92(1):52–65. 710  
711  
712
33. Manning JR, Jacobs J, Fried I, Kahana MJ. Broadband shifts in LFP power spectra are correlated with single-neuron spiking in humans. *J Neurosci Off J Soc Neurosci*. 2009 Oct 28;29(43):13613–20. 713  
714  
715
34. Burns SP, Xing D, Shapley RM. Comparisons of the Dynamics of Local Field Potential and Multiunit Activity Signals in Macaque Visual Cortex. *J Neurosci*. 2010 Oct 13;30(41):13739. 716  
717  
718
35. Sakai M, Suga N. Plasticity of the cochleotopic (frequency) map in specialized and nonspecialized auditory cortices. *Proc Natl Acad Sci*. 2001 Mar 13;98(6):3507–12. 719  
720  
721



36. Sakai M, Suga N. Centripetal and centrifugal reorganizations of frequency map of auditory cortex in gerbils. *Proc Natl Acad Sci.* 2002 May 14;99(10):7108–12. 722 723
37. David SV, Fritz JB, Shamma SA. Task reward structure shapes rapid receptive field plasticity in auditory cortex. *Proc Natl Acad Sci.* 2012 Feb 7;109(6):2144–9. 724 725 726
38. Percaccio CR, Engineer ND, Pruetten AL, Pandya PK, Moucha R, Rathbun DL, et al. Environmental enrichment increases paired-pulse depression in rat auditory cortex. *J Neurophysiol.* 2005 Nov;94(5):3590–600. 727 728 729
39. Rumpel S, LeDoux J, Zador A, Malinow R. Postsynaptic Receptor Trafficking Underlying a Form of Associative Learning. *Science.* 2005 Apr 1;308(5718):83–8. 730 731 732
40. Maor I, Shalev A, Mizrahi A. Distinct Spatiotemporal Response Properties of Excitatory Versus Inhibitory Neurons in the Mouse Auditory Cortex. *Cereb Cortex.* 2016 Oct 17;26(11):4242–52. 733 734 735 736 737

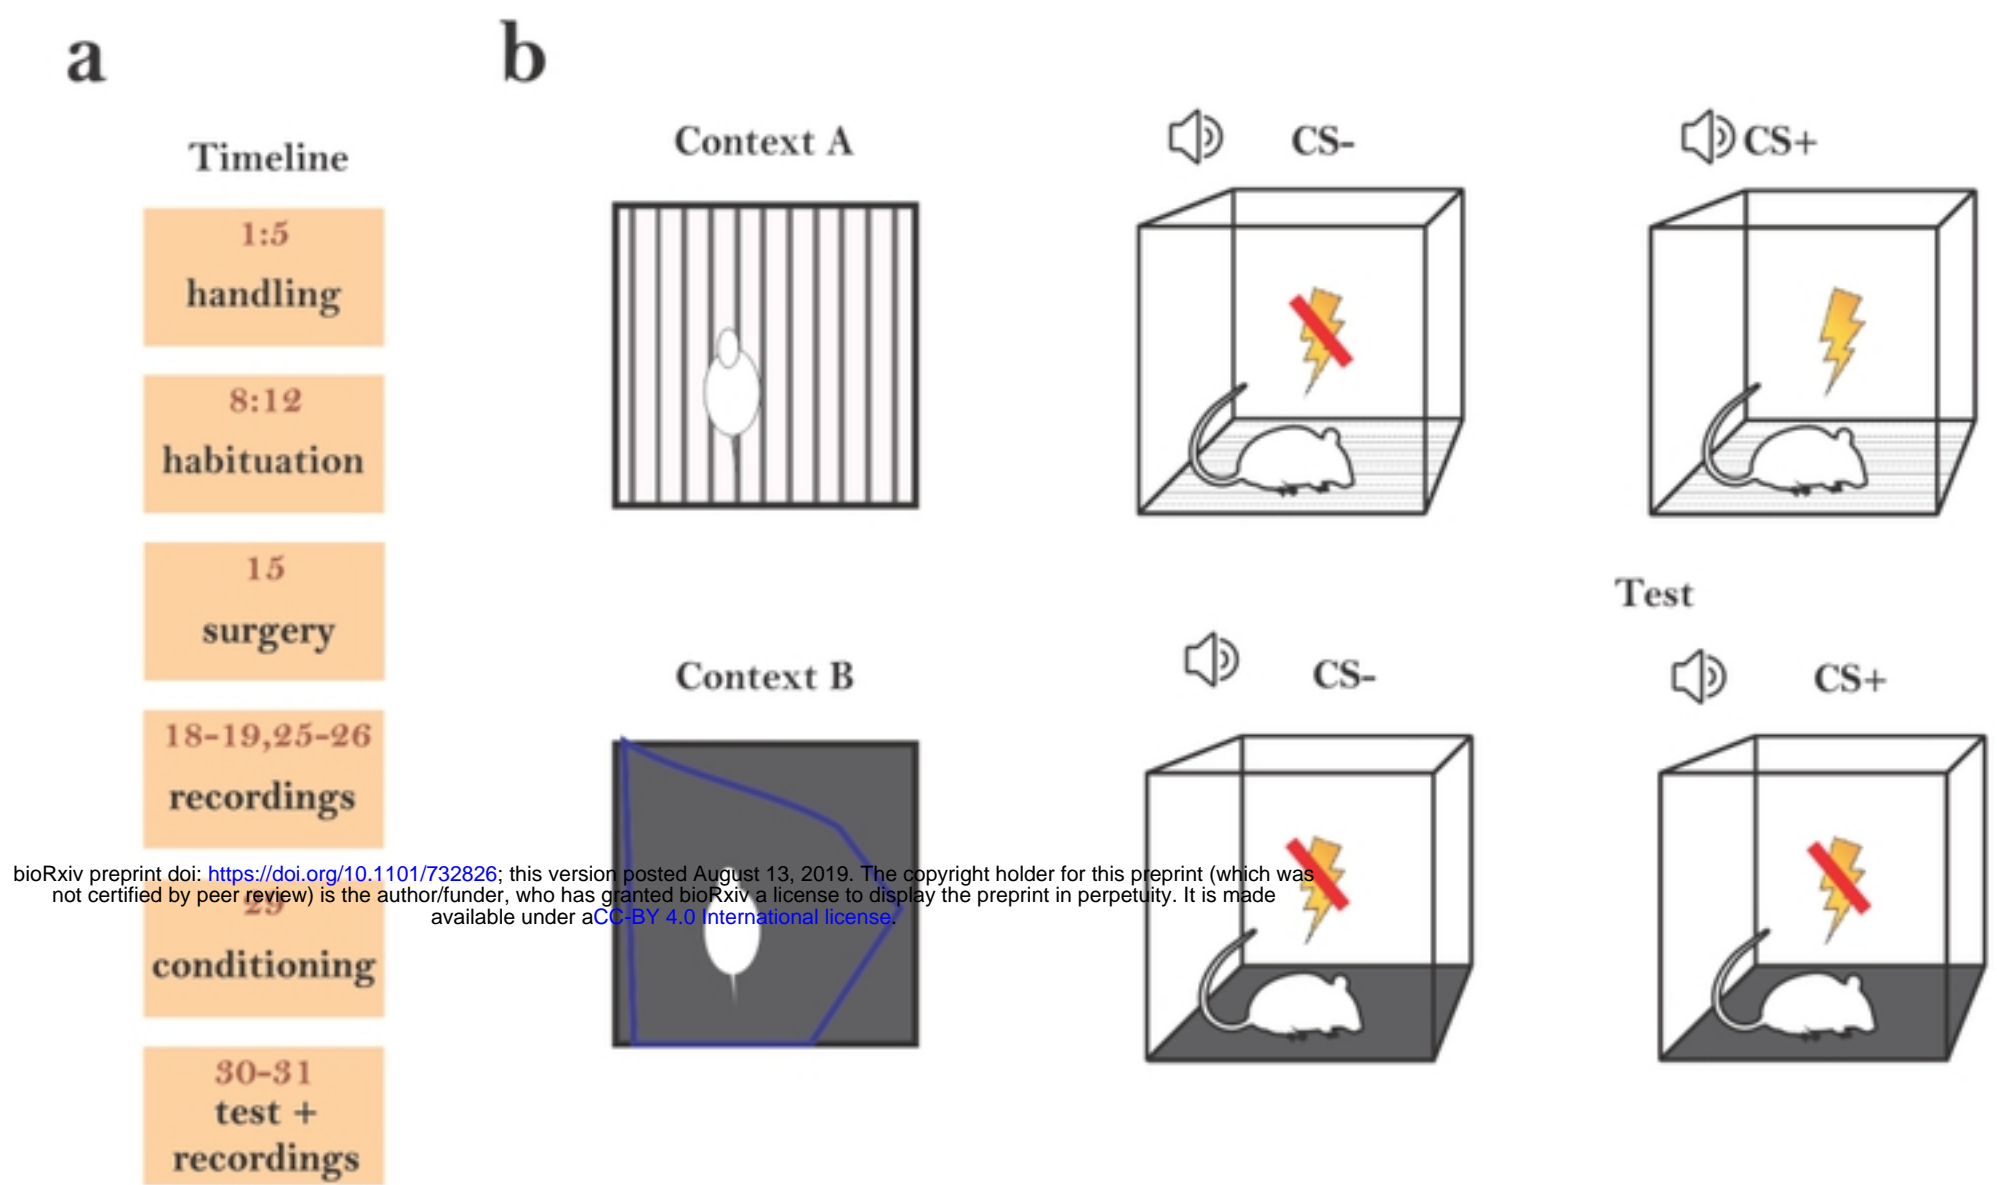

bioRxiv preprint doi: <https://doi.org/10.1101/732826>; this version posted August 13, 2019. The copyright holder for this preprint (which was not certified by peer review) is the author/funder, who has granted bioRxiv a license to display the preprint in perpetuity. It is made available under aCC-BY 4.0 International license.

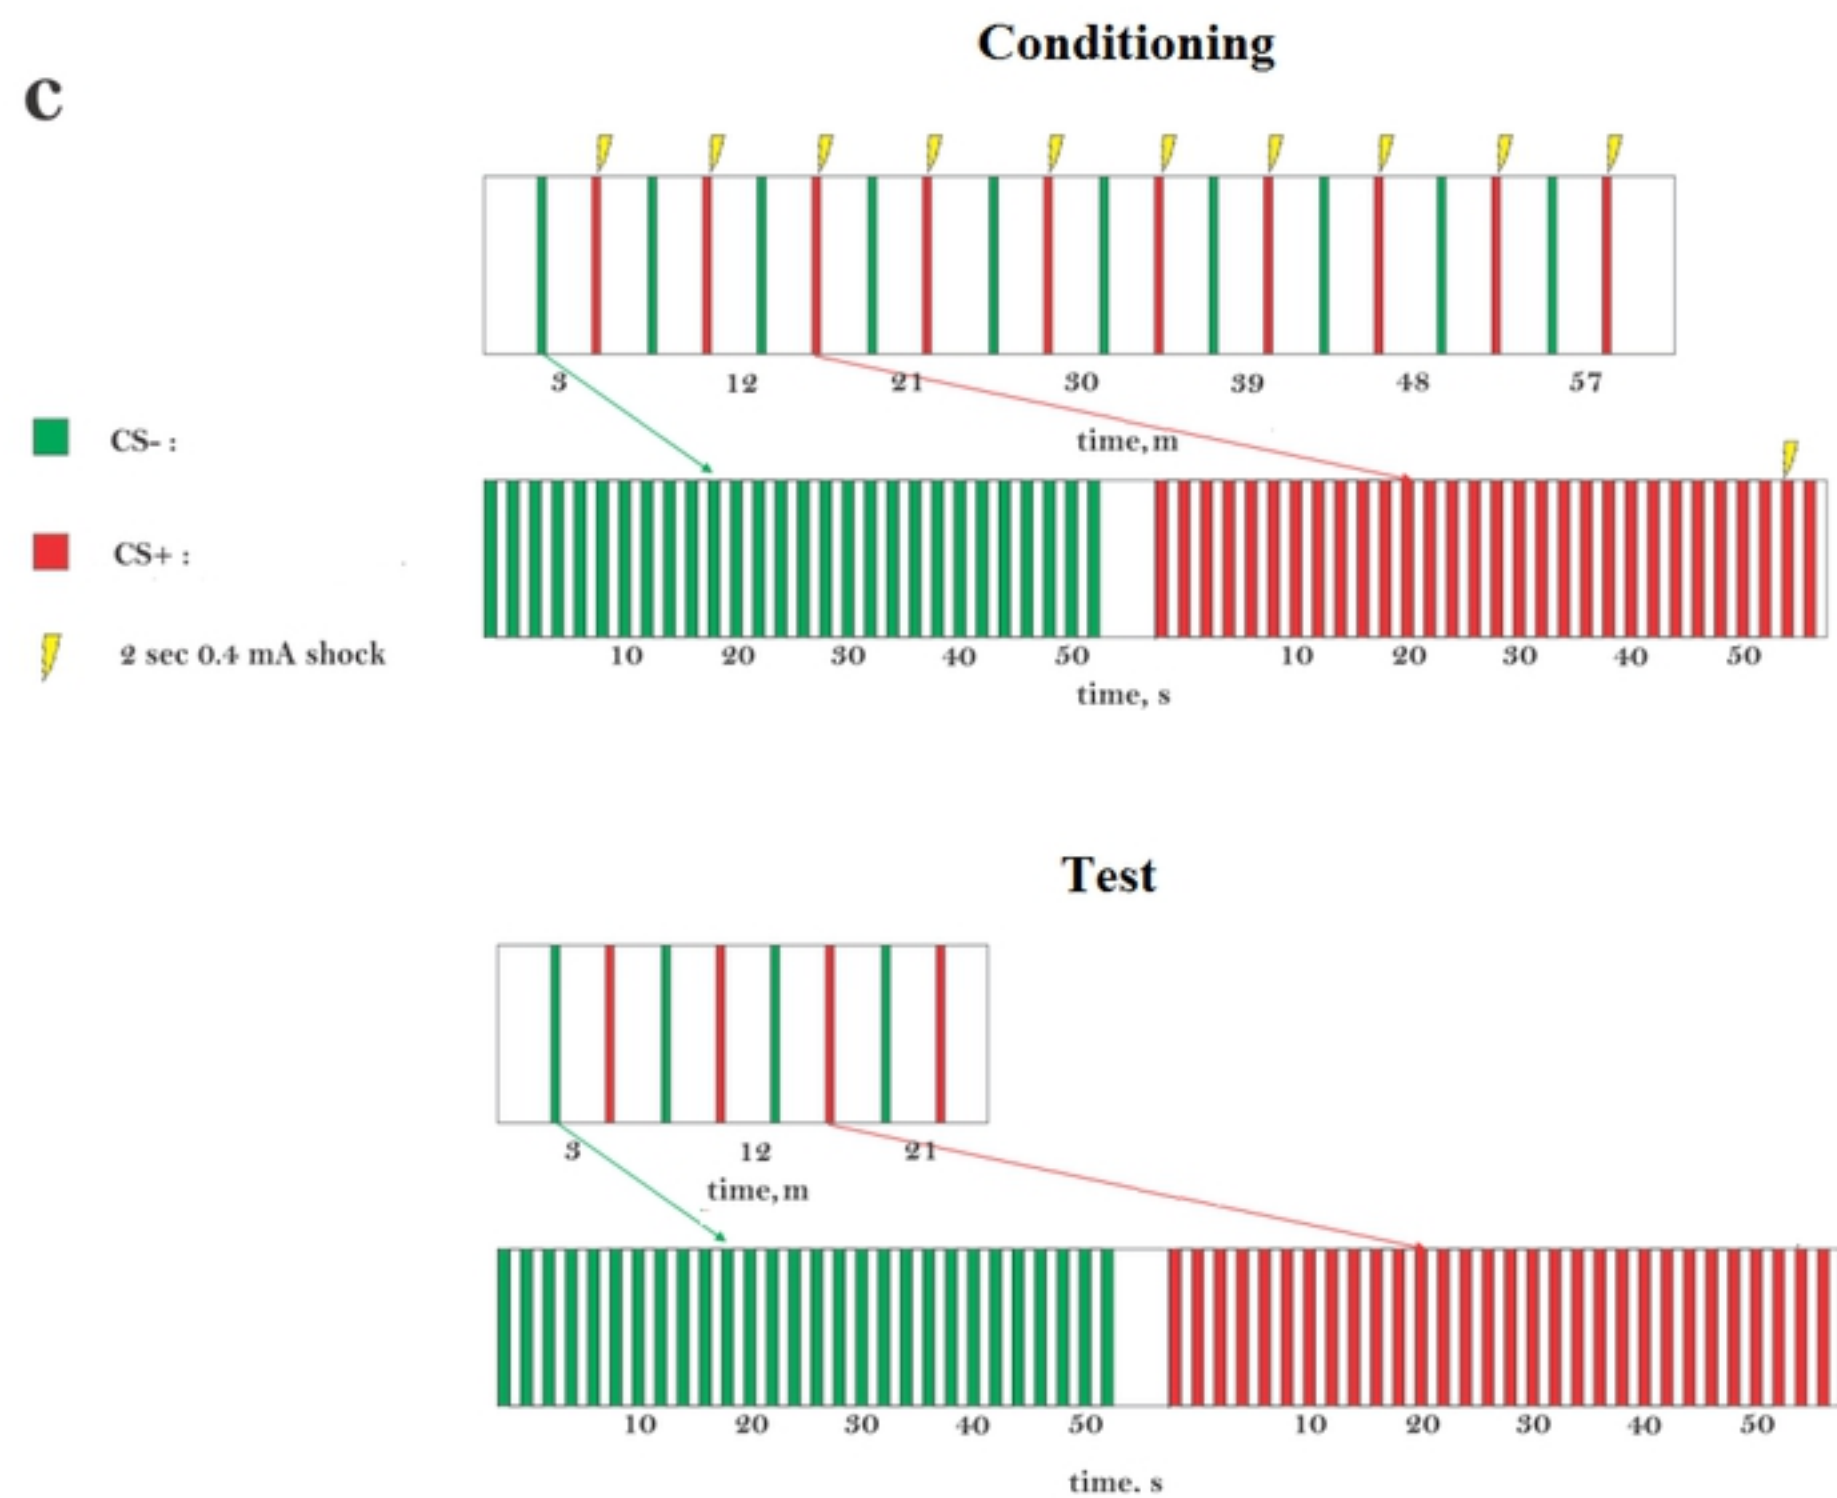

Figure 1

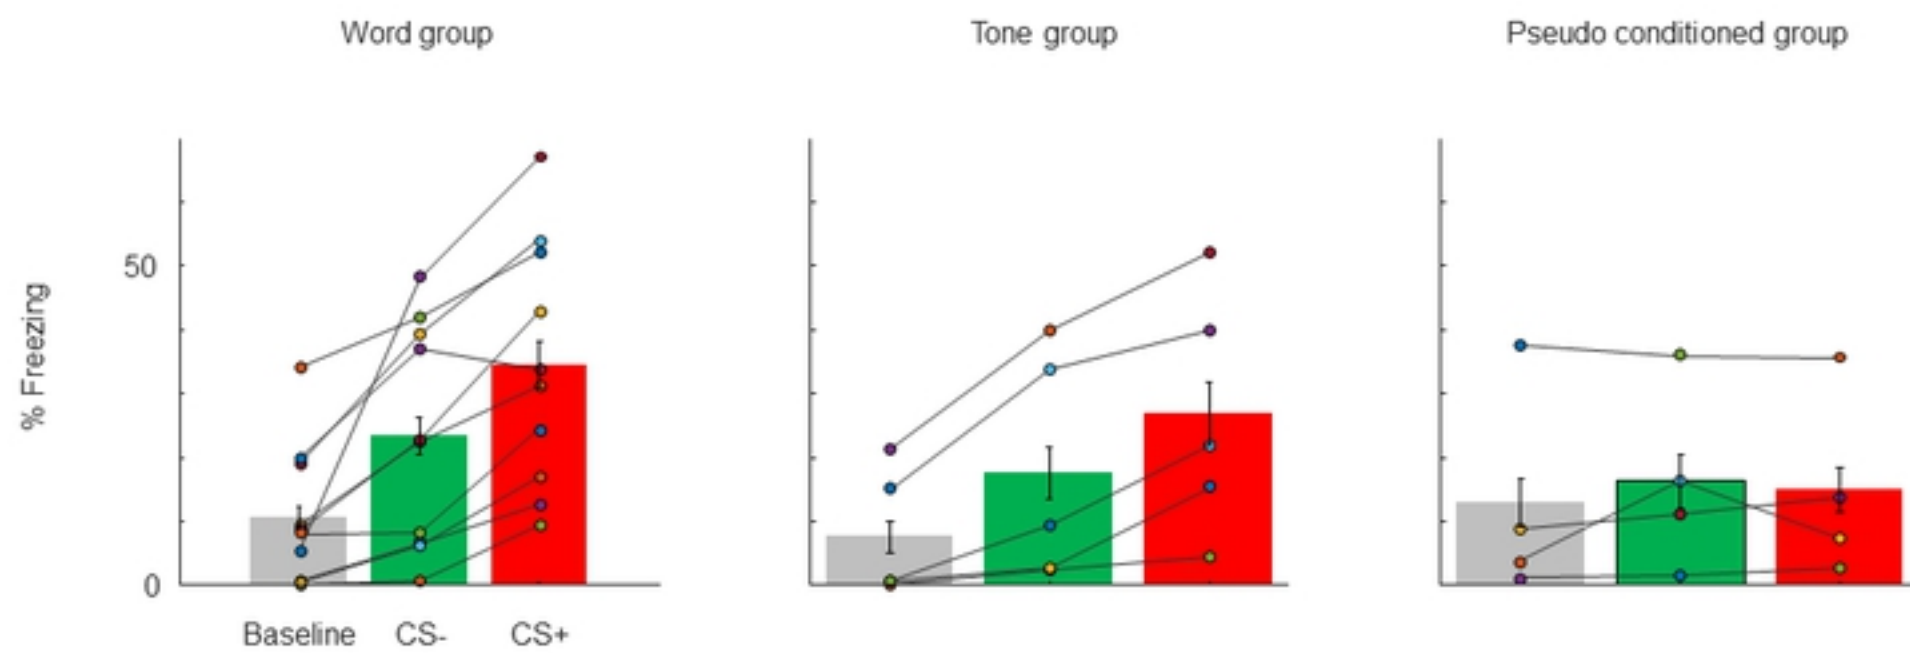

Figure 2

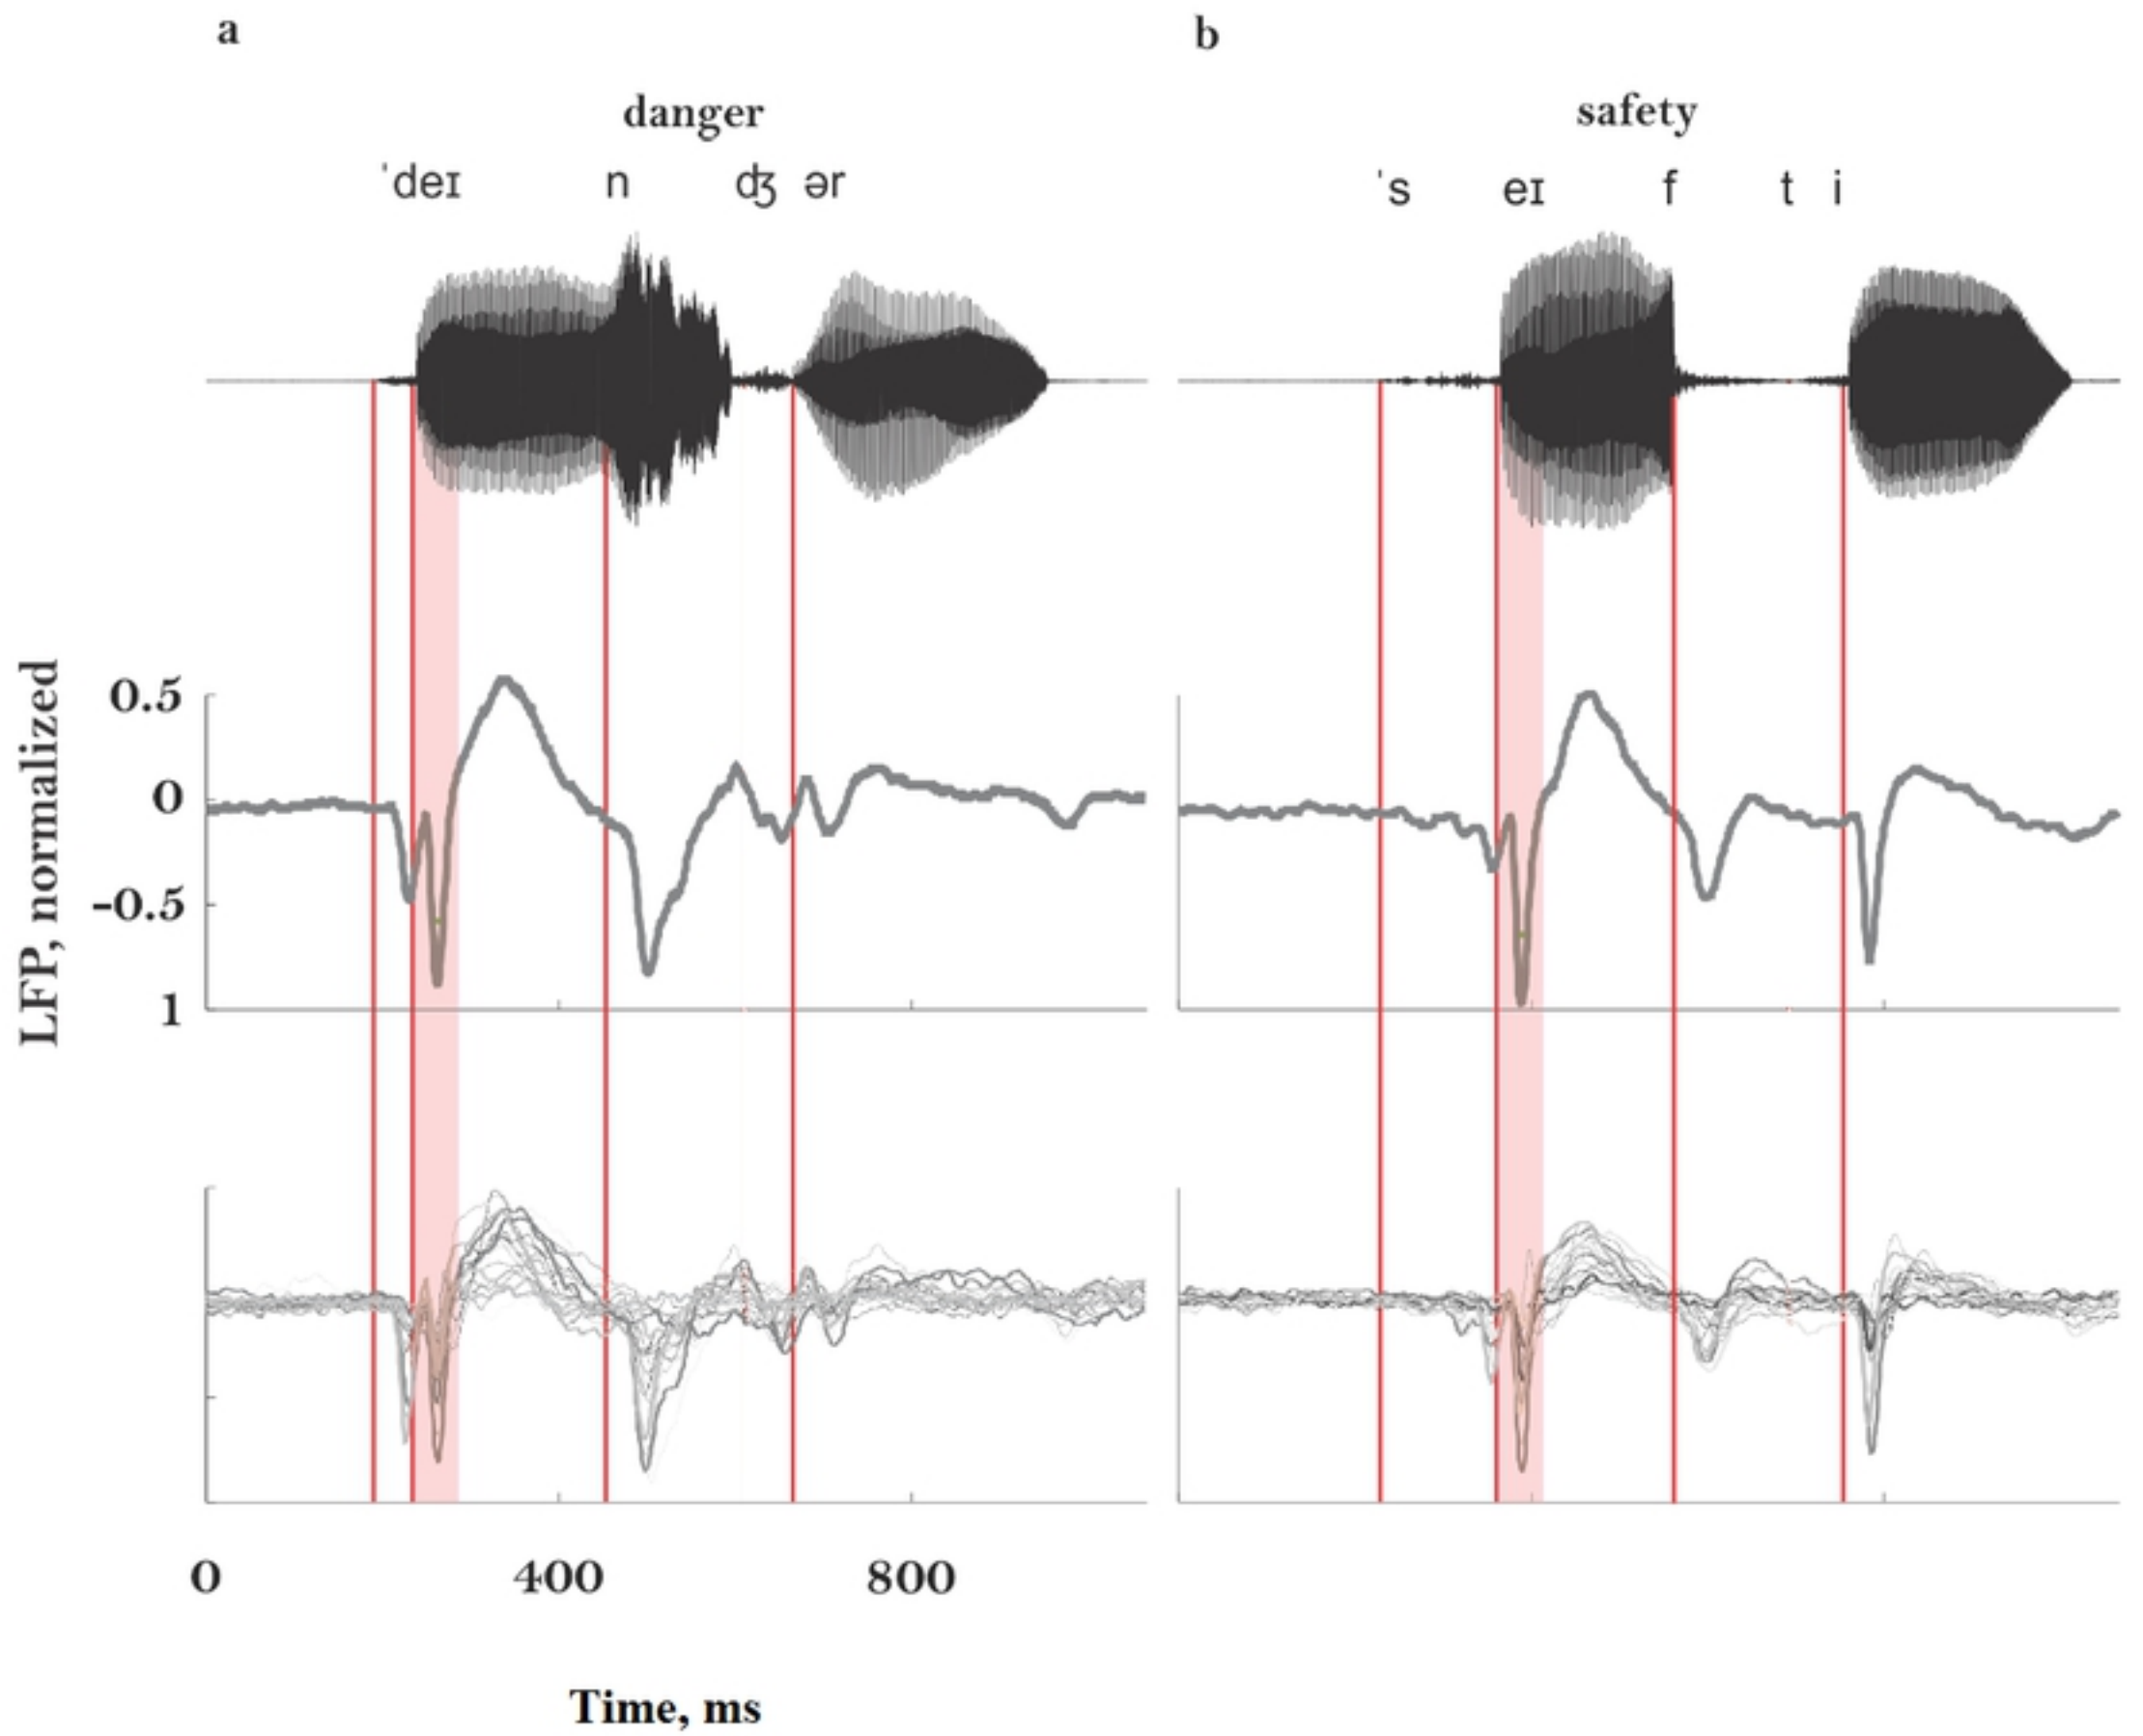

Figure 3

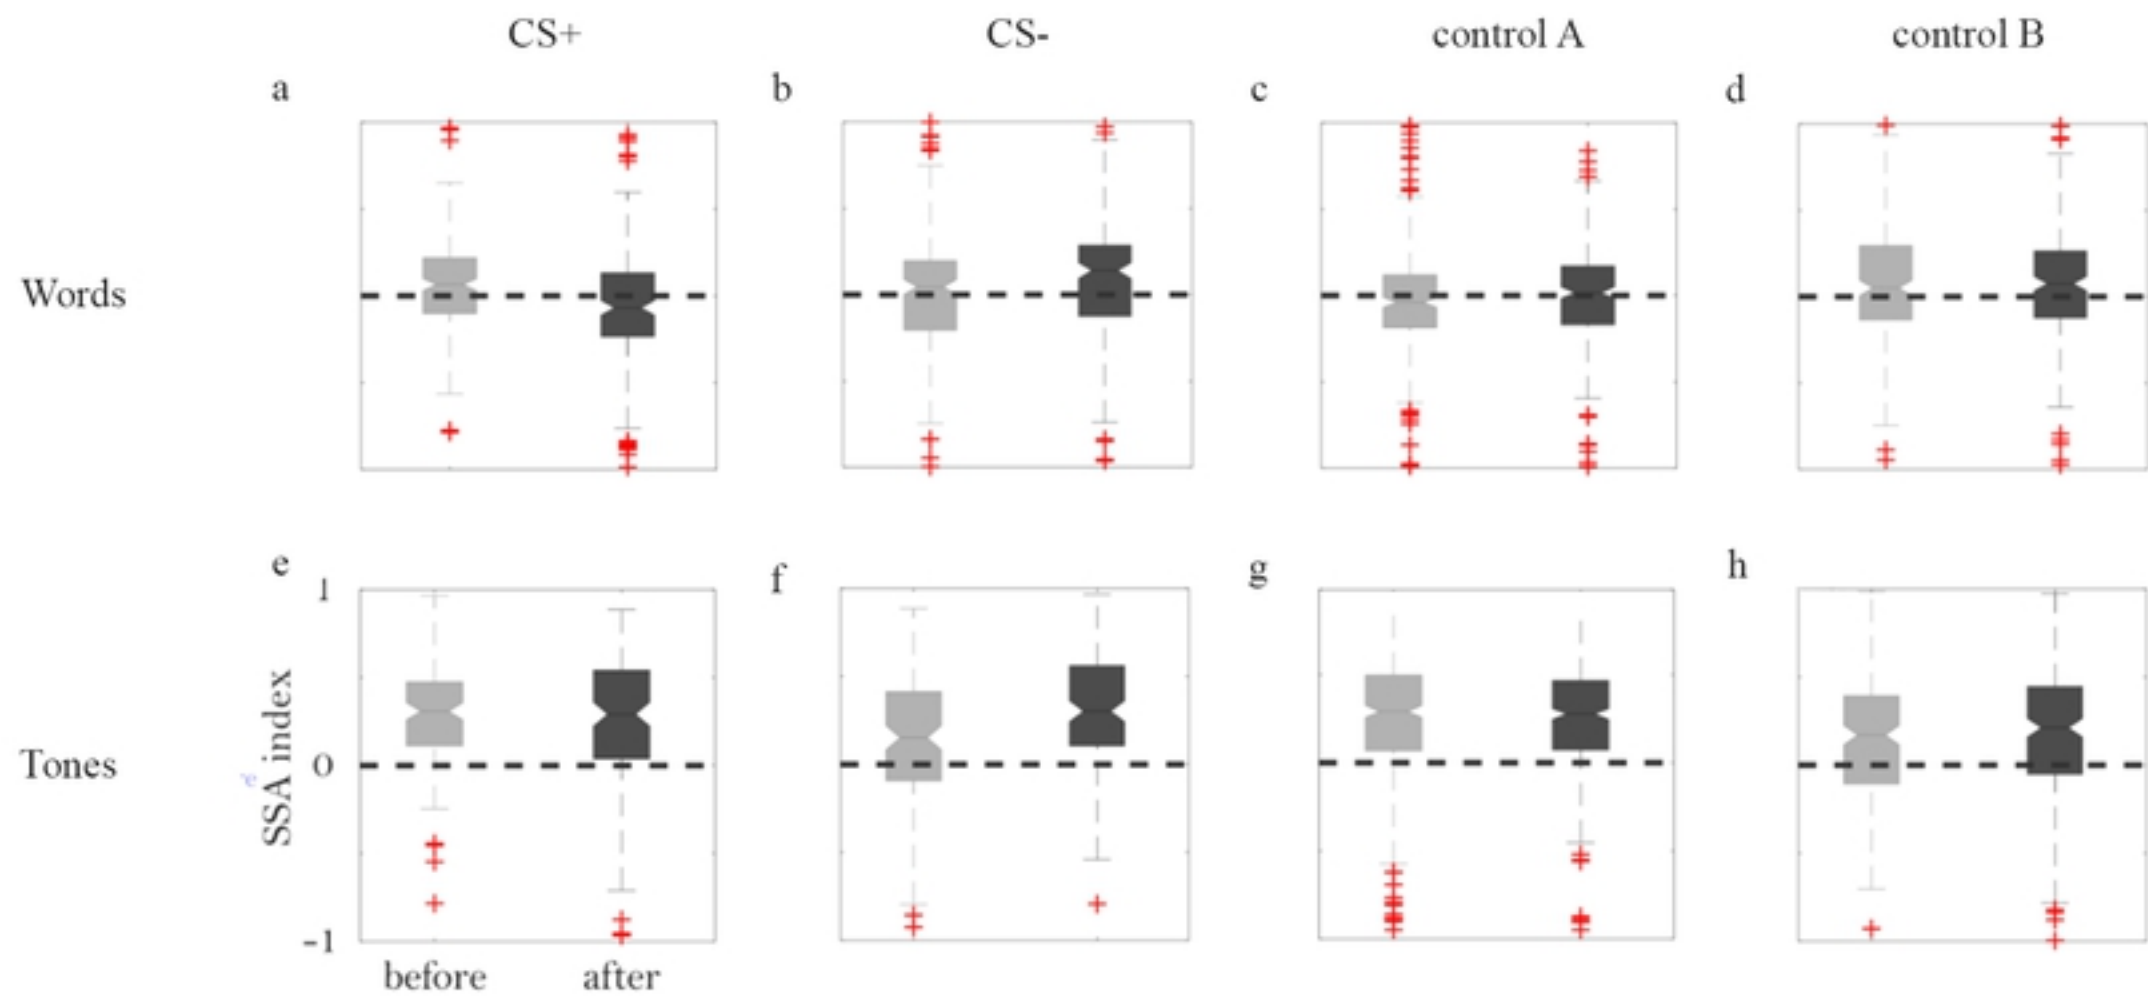

Figure 4

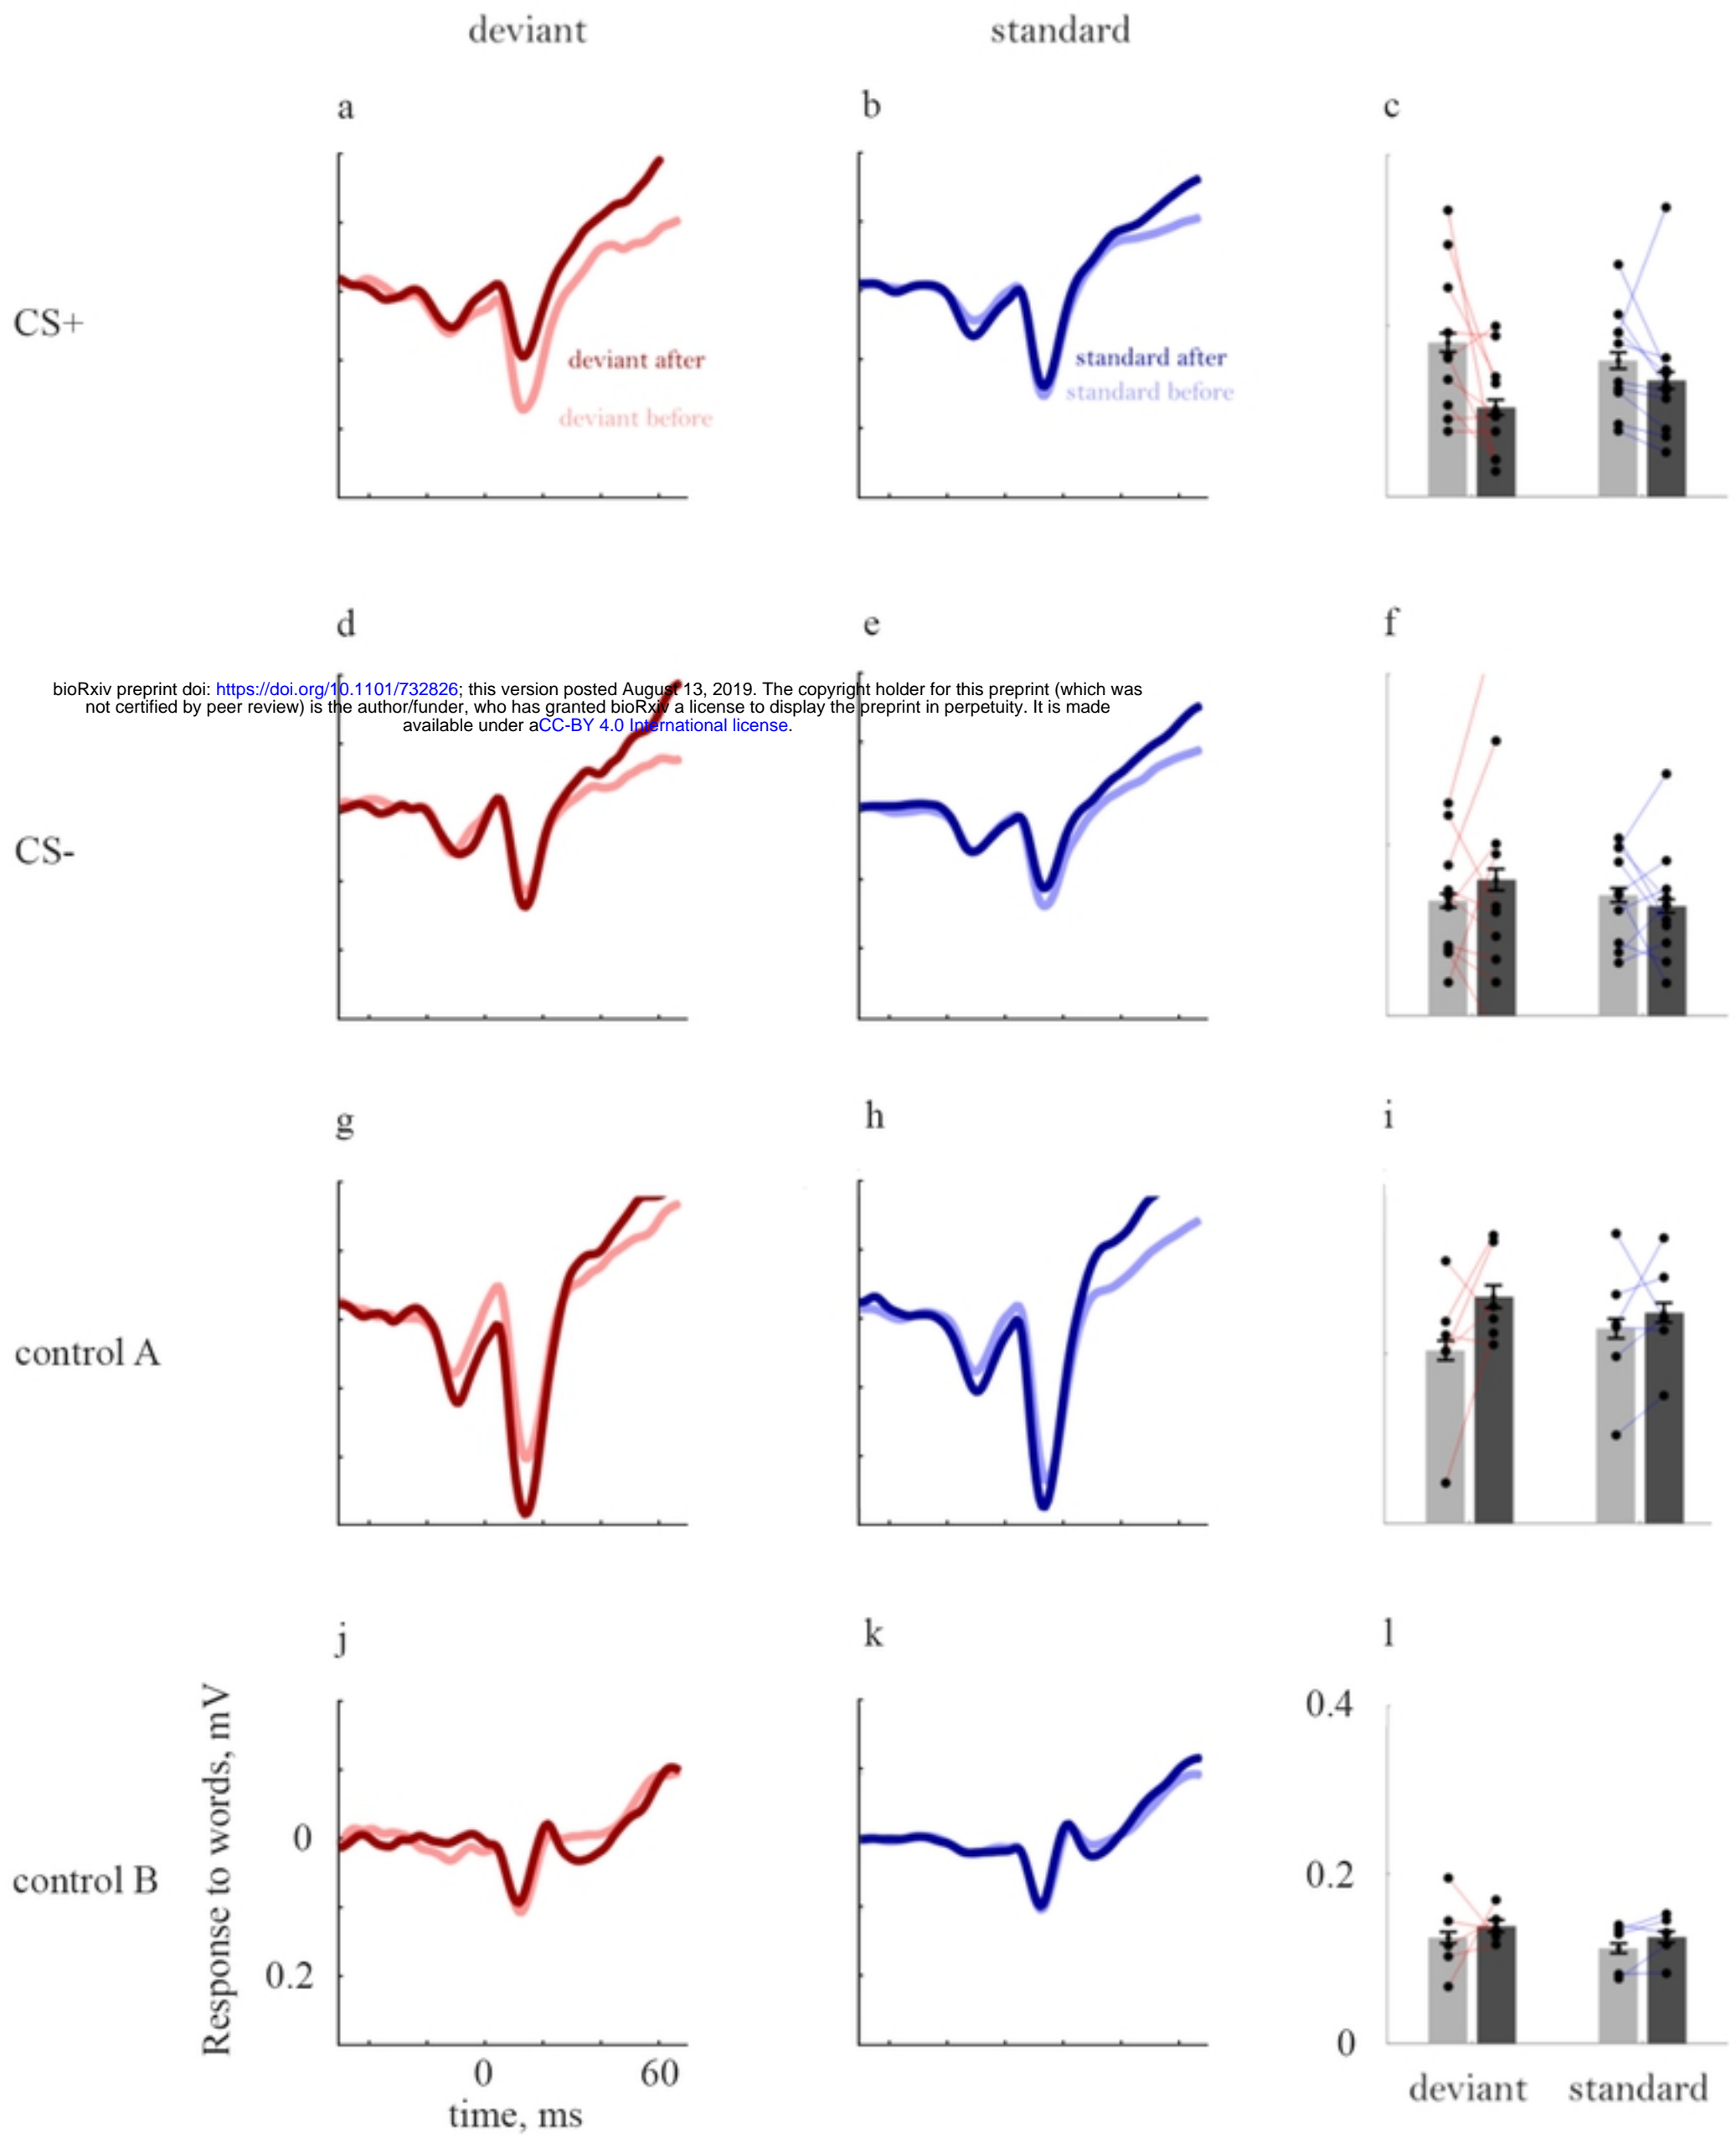

Figure 5

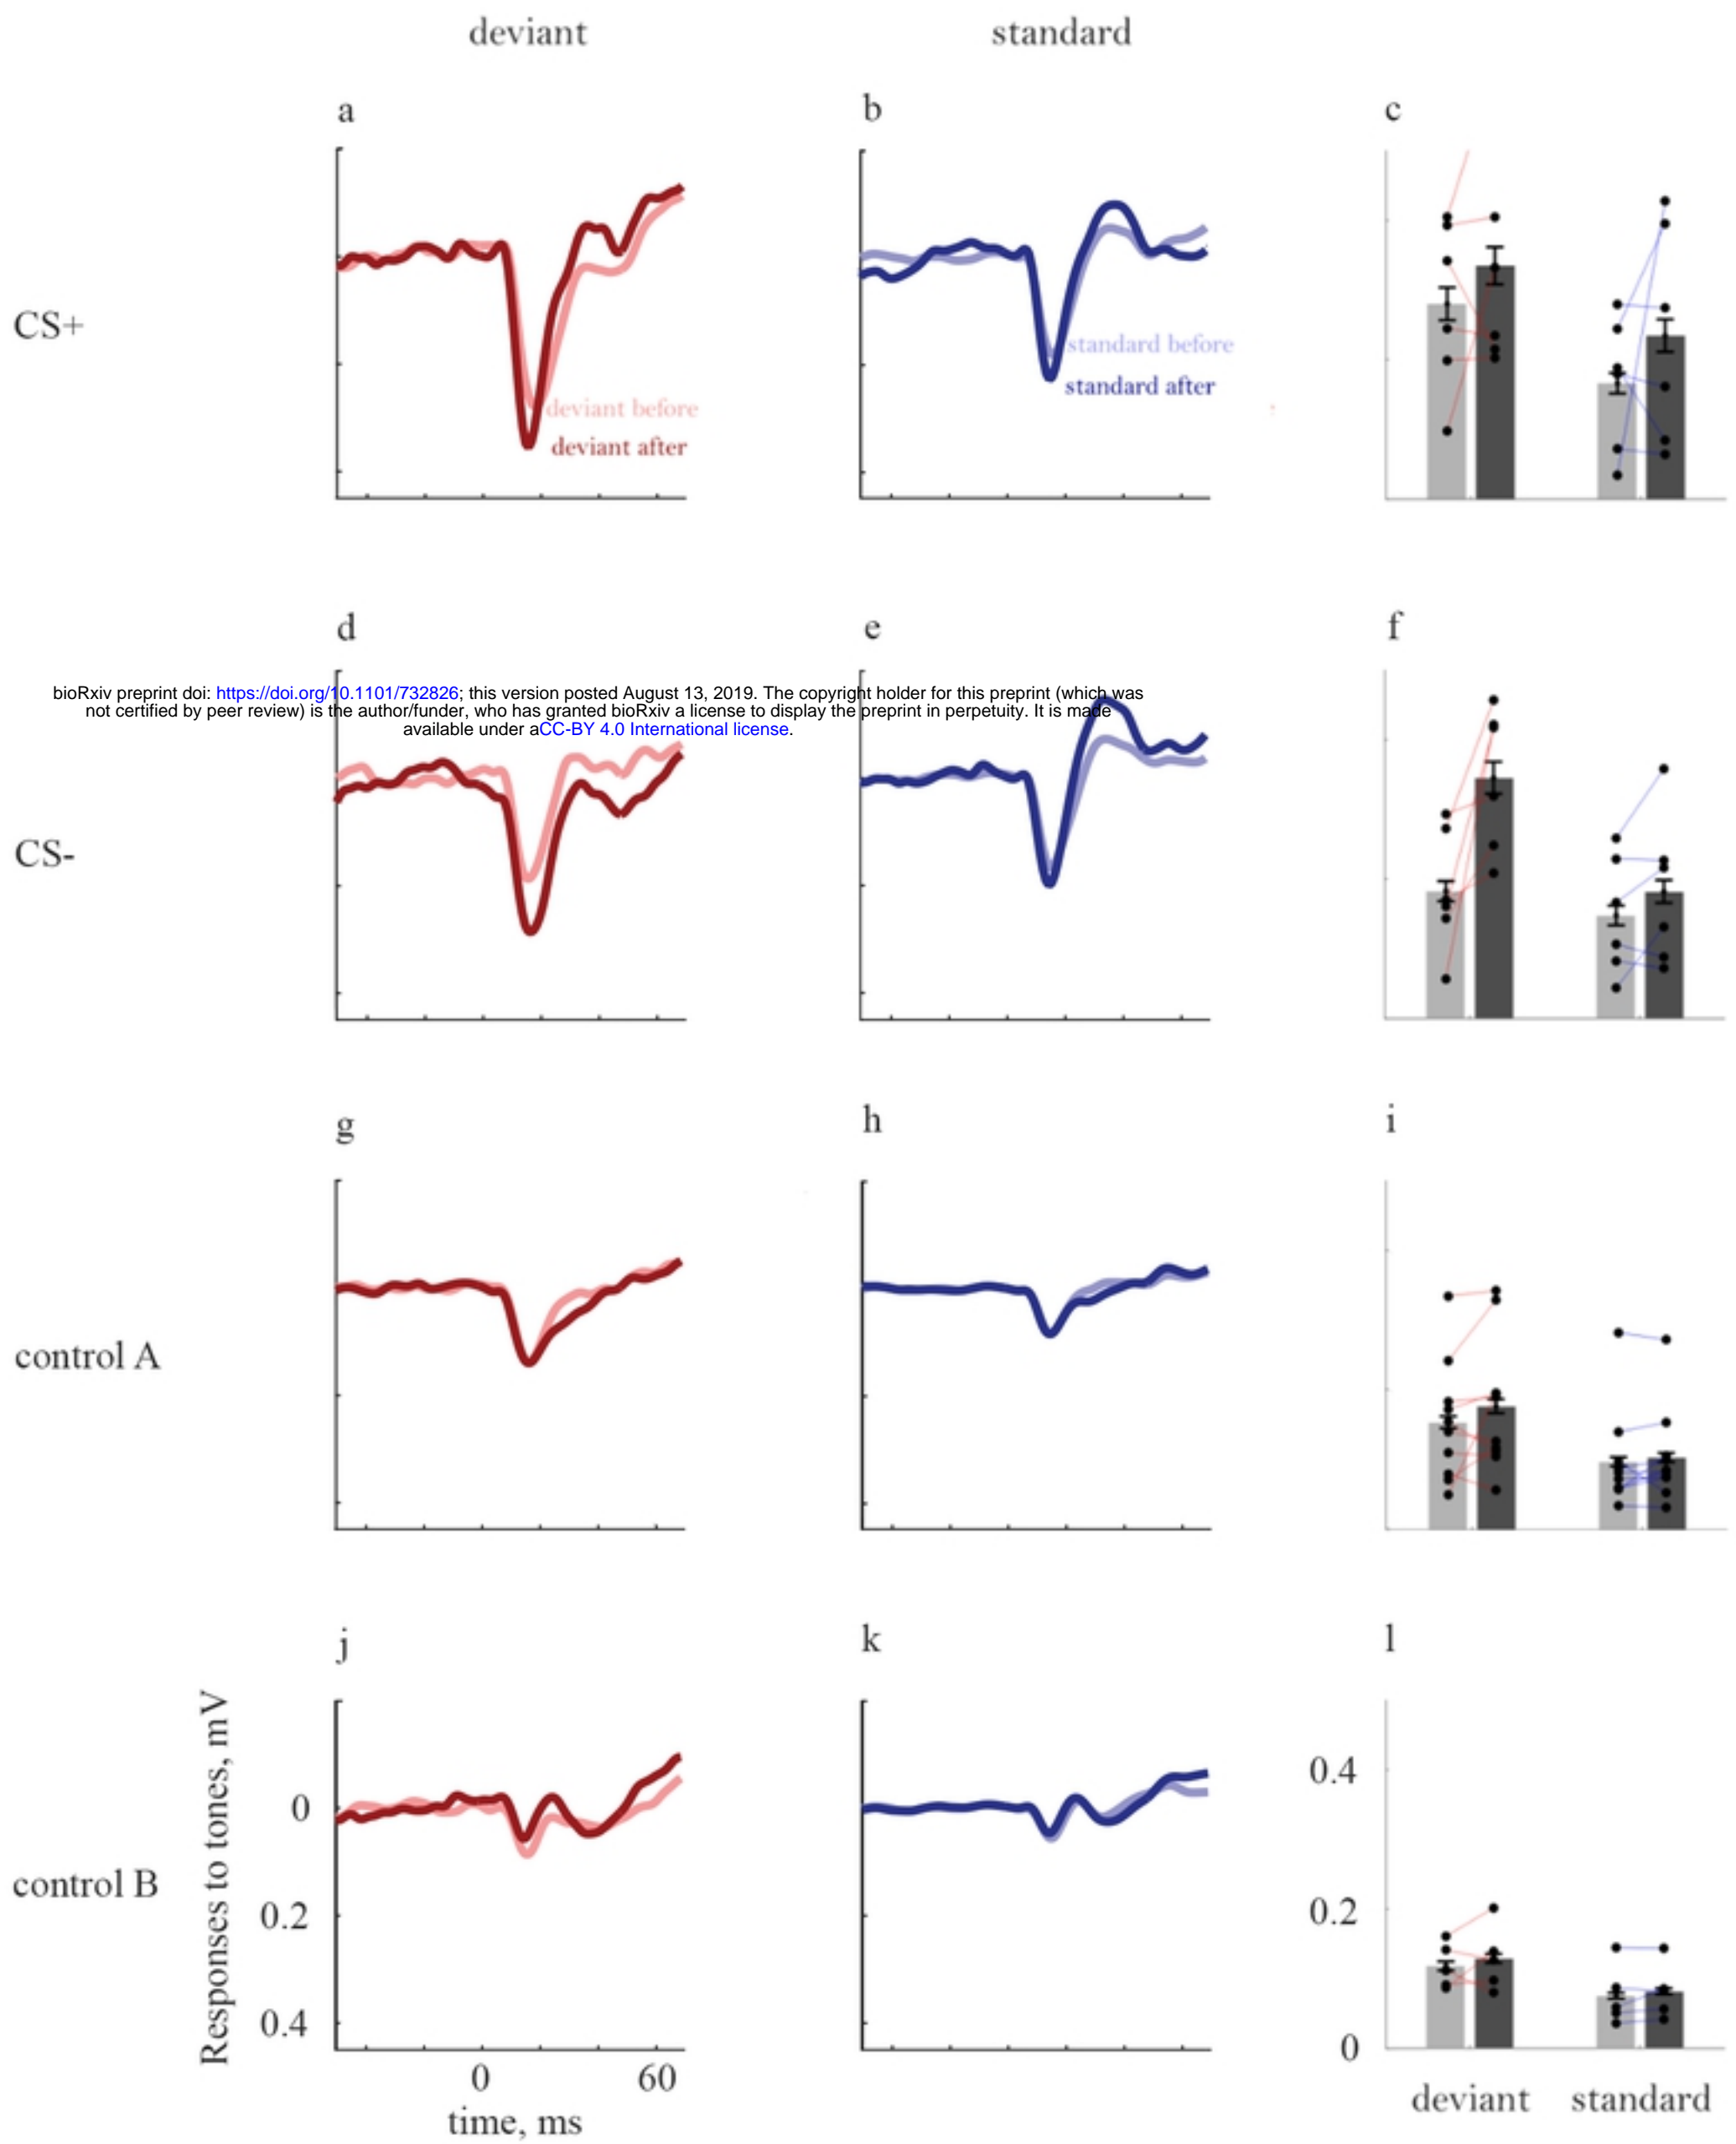

Figure 6



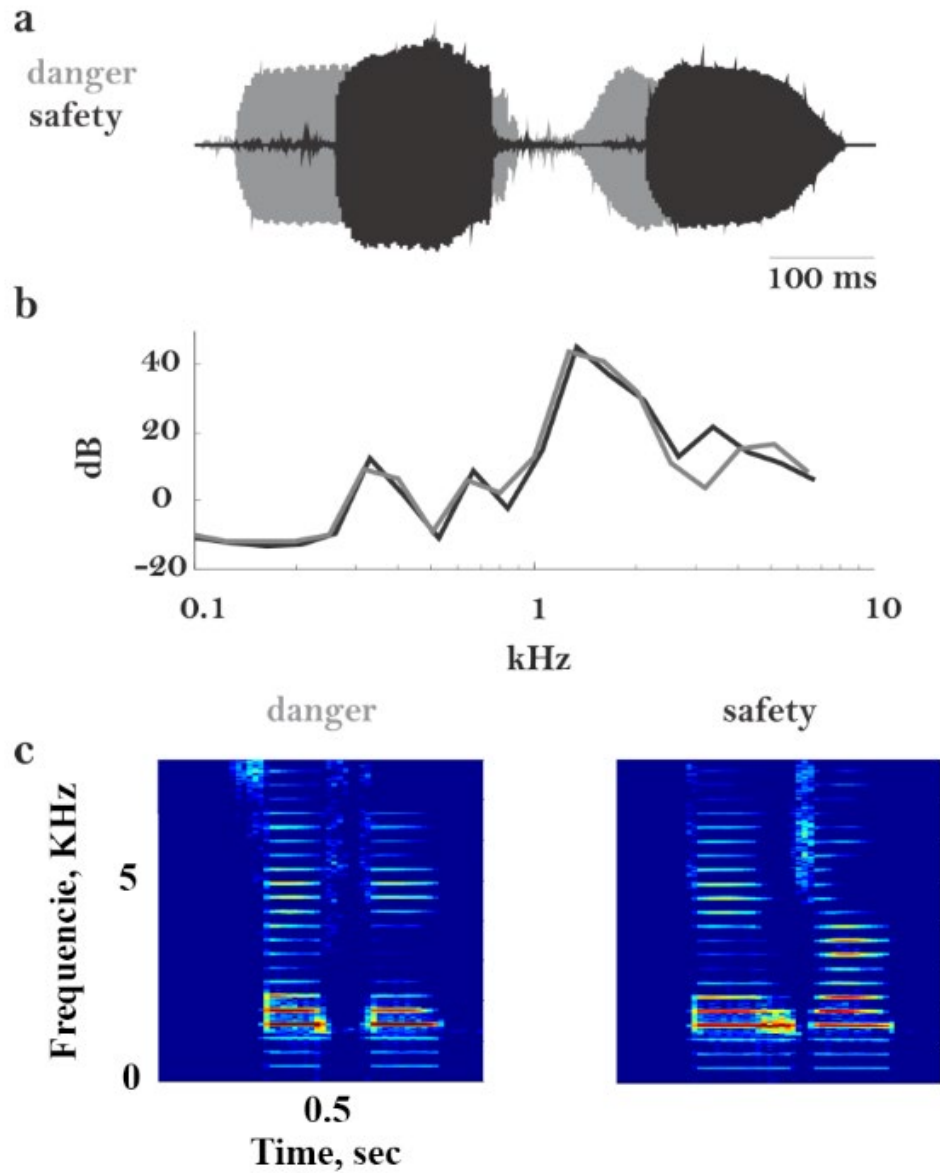

*Supplementary Figure 1. The word-like stimuli.*

Three different characterizations are displayed. a. Oscillograms of the two words. The two high-amplitude vowels in each word are clearly visible. b. Average power spectrum in 1/3 octave bands. The average power spectrum has been carefully equalized between the two stimuli. c. Spectrograms of the two stimuli. The ladder-like structures are the harmonics of the pitch of the two vowels, set to 300 Hz.



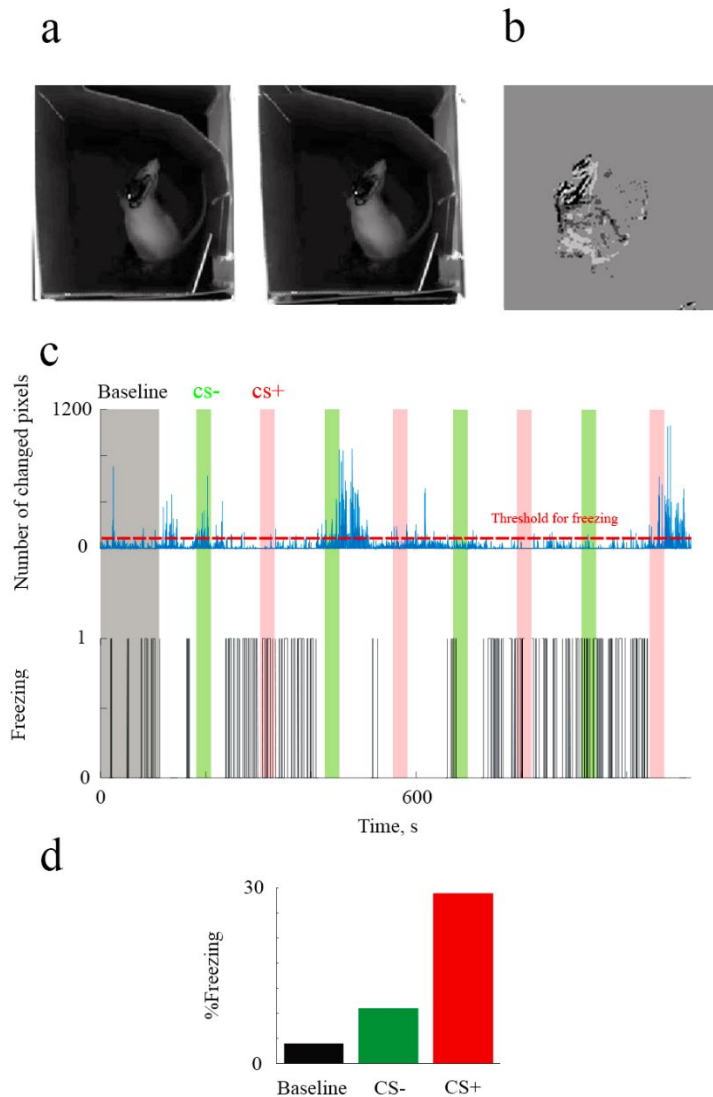

***Supplementary Figure 2. Detection of freezing.***

The algorithm used the video movie of the test episode. Starting from the individual frames (a), pairwise differences between successive frames were computed (b). The number of non-zero pixels was counted and smoothed. Panel c (blue) shows an example of such a smoothed trace. Freezing periods were determined by thresholding this trace (red line). Panel c (black) shows the resulting decisions. The fraction of time that freezing episodes occupied was determined separately for a baseline period (gray rectangle), for presentations of the CS+ (red) and for presentations of the CS- (green), as shown in panel d.
